# Supplementary material
Source: MDPI journal article supplement (https://www.mdpi.com/2075-163X/11/2/116)
Supplement: s1 [file s1]

# Supplementary Materials: Burial and Exhumation History of the Lujing Uranium Ore Field, Zhuguangshan Complex, South China: Evidence from Low-Temperature Thermochronology

Yue Sun, Barry P. Kohn, Samuel C. Boone, Dongsheng Wang and Kaixing Wang

**Table 1.** Detailed apatite fission track data of individual sample.

| Sample ZG01, Apatite Fission-Track Length Data. |                                       |                         |                                        |         |       |       |                           |      |
|-------------------------------------------------|---------------------------------------|-------------------------|----------------------------------------|---------|-------|-------|---------------------------|------|
| ID                                              | L <sub>App</sub><br>( $\mu\text{m}$ ) | Dz<br>( $\mu\text{m}$ ) | L <sub>True</sub><br>( $\mu\text{m}$ ) | Azimuth | Dip   | Angle | DPar<br>( $\mu\text{m}$ ) | SD   |
| Length01                                        | 11.1                                  | 0                       | 11.1                                   | 21.31   | 0     | 21.31 | 1.86                      | 0.07 |
| Length02                                        | 11.02                                 | 0.82                    | 11.05                                  | 76.97   | 4.25  | 77.01 | 1.92                      | 0.04 |
| Length03                                        | 13.39                                 | 0                       | 13.39                                  | 32.23   | 0     | 32.23 | 1.92                      | 0.04 |
| Length04                                        | 13.68                                 | 3.27                    | 14.07                                  | 20.08   | 13.45 | 24.01 | 1.72                      | 0.14 |
| Length05                                        | 13.36                                 | 1.64                    | 13.46                                  | 61.96   | 6.98  | 62.18 | 1.96                      | 0.06 |
| Length06                                        | 12.35                                 | 0.82                    | 12.38                                  | 75.89   | 3.79  | 75.92 | 1.96                      | 0.06 |
| Length07                                        | 15.6                                  | 0.82                    | 15.62                                  | 80.76   | 3     | 80.77 | 1.96                      | 0.06 |
| Length08                                        | 10.9                                  | 3.27                    | 11.38                                  | 78.72   | 16.71 | 79.2  | 1.96                      | 0.06 |
| Length09                                        | 13.06                                 | 4.09                    | 13.68                                  | 87.28   | 17.39 | 87.41 | 1.96                      | 0.06 |
| Length10                                        | 9.38                                  | 9                       | 13                                     | 83.26   | 43.82 | 85.14 | 1.96                      | 0.06 |
| Length11                                        | 13.01                                 | 3.27                    | 13.41                                  | 49.52   | 14.12 | 50.98 | 1.67                      | 0.19 |
| Length12                                        | 14.66                                 | 0                       | 14.66                                  | 63.41   | 0     | 63.41 | 1.82                      | 0.16 |
| Length13                                        | 15.83                                 | 0.49                    | 15.83                                  | 62.57   | 1.78  | 62.58 | 1.63                      | 0.08 |
| Length14                                        | 11.3                                  | 1.96                    | 11.47                                  | 57.05   | 9.85  | 57.6  | 1.53                      | 0.12 |
| Length15                                        | 13.11                                 | 0                       | 13.11                                  | 55.5    | 0     | 55.5  | 1.68                      | 0.07 |
| Length16                                        | 10.18                                 | 5.4                     | 11.52                                  | 38.11   | 27.94 | 45.97 | 1.68                      | 0.07 |
| Length17                                        | 15.33                                 | 3.93                    | 15.82                                  | 89.48   | 14.37 | 89.5  | 1.56                      | 0.07 |
| Length18                                        | 11.48                                 | 5.89                    | 12.91                                  | 25.12   | 27.15 | 36.33 | 1.56                      | 0.07 |
| Length19                                        | 13.75                                 | 0.98                    | 13.78                                  | 88.63   | 4.08  | 88.63 | 1.56                      | 0.07 |
| Length20                                        | 12.5                                  | 1.96                    | 12.65                                  | 18.77   | 8.93  | 20.72 | 1.56                      | 0.07 |
| Length21                                        | 12.21                                 | 0.49                    | 12.22                                  | 73.44   | 2.3   | 73.45 | 1.61                      | 0.14 |
| Length22                                        | 11.47                                 | 4.42                    | 12.29                                  | 42.35   | 21.06 | 46.4  | 1.58                      | 0.11 |
| Length23                                        | 13.78                                 | 0.98                    | 13.82                                  | 69.48   | 4.07  | 69.53 | 1.58                      | 0.11 |
| Length24                                        | 12.35                                 | 4.91                    | 13.29                                  | 71.8    | 21.67 | 73.12 | 1.41                      | 0.06 |
| Length25                                        | 14.44                                 | 2.94                    | 14.74                                  | 51.58   | 11.53 | 52.49 | 1.41                      | 0.06 |
| Length26                                        | 13.89                                 | 0.98                    | 13.93                                  | 69.47   | 4.04  | 69.52 | 1.73                      | 0.13 |
| Length27                                        | 13.19                                 | 0.98                    | 13.23                                  | 73.64   | 4.26  | 73.69 | 1.73                      | 0.13 |
| Length28                                        | 14.15                                 | 0                       | 14.15                                  | 30.89   | 0     | 30.89 | 1.57                      | 0.05 |
| Length29                                        | 14.57                                 | 3.44                    | 14.97                                  | 80.1    | 13.27 | 80.37 | 1.57                      | 0.05 |
| Length30                                        | 15.33                                 | 0.49                    | 15.34                                  | 22.22   | 1.83  | 22.29 | 1.57                      | 0.07 |
| Length31                                        | 13.91                                 | 1.96                    | 14.05                                  | 56.36   | 8.03  | 56.74 | 1.64                      | 0.12 |
| Length32                                        | 13.75                                 | 3.93                    | 14.3                                   | 38.06   | 15.93 | 40.79 | 1.64                      | 0.12 |
| Length33                                        | 14.22                                 | 2.94                    | 14.53                                  | 80.37   | 11.7  | 80.58 | 1.64                      | 0.12 |
| Length34                                        | 10.27                                 | 0.49                    | 10.28                                  | 58.2    | 2.74  | 58.24 | 1.66                      | 0.06 |
| Length35                                        | 10.97                                 | 0                       | 10.97                                  | 41.95   | 0     | 41.95 | 1.44                      | 0.07 |
| Length36                                        | 14.54                                 | 0                       | 14.54                                  | 76.1    | 0     | 76.1  | 1.54                      | 0.05 |
| Length37                                        | 13.16                                 | 0.98                    | 13.2                                   | 80.59   | 4.27  | 80.61 | 1.54                      | 0.05 |
| Length38                                        | 13.06                                 | 3.44                    | 13.51                                  | 69.1    | 14.74 | 69.81 | 1.54                      | 0.05 |
| Length39                                        | 13.2                                  | 0.49                    | 13.21                                  | 80.42   | 2.13  | 80.43 | 1.54                      | 0.05 |
| Length40                                        | 14.51                                 | 4.91                    | 15.32                                  | 83.74   | 18.69 | 84.07 | 1.54                      | 0.05 |
| Length41                                        | 13.71                                 | 0                       | 13.71                                  | 61.81   | 0     | 61.81 | 1.75                      | 0.08 |

|          |       |      |       |       |       |       |      |      |
|----------|-------|------|-------|-------|-------|-------|------|------|
| Length42 | 13.64 | 0    | 13.64 | 48.25 | 0     | 48.25 | 1.73 | 0.11 |
| Length43 | 13.59 | 0.49 | 13.6  | 57.35 | 2.07  | 57.37 | 1.73 | 0.11 |
| Length44 | 12.35 | 2.45 | 12.6  | 45.44 | 11.23 | 46.51 | 1.53 | 0.06 |
| Length45 | 13.04 | 2.94 | 13.37 | 80.15 | 12.72 | 80.4  | 1.78 | 0.15 |
| Length46 | 9.94  | 0    | 9.94  | 57.65 | 0     | 57.65 | 1.55 | 0.04 |
| Length47 | 13.85 | 0.49 | 13.86 | 83.34 | 2.03  | 83.34 | 1.55 | 0.04 |
| Length48 | 13.67 | 0    | 13.67 | 39.48 | 0     | 39.48 | 1.49 | 0.08 |
| Length49 | 11.9  | 0.49 | 11.91 | 31.32 | 2.36  | 31.4  | 1.4  | 0.08 |
| Length50 | 12.56 | 1.96 | 12.71 | 34.89 | 8.88  | 35.86 | 1.67 | 0.09 |
| Length51 | 12.4  | 2.45 | 12.64 | 82.1  | 11.19 | 82.25 | 1.67 | 0.09 |
| Length52 | 12.22 | 0.49 | 12.23 | 75.79 | 2.3   | 75.8  | 1.62 | 0.11 |
| Length53 | 13.55 | 0.49 | 13.56 | 45.85 | 2.07  | 45.89 | 1.62 | 0.07 |
| Length54 | 11.21 | 0.98 | 11.25 | 83.09 | 5     | 83.11 | 1.5  | 0.06 |
| Length55 | 13.55 | 0.49 | 13.56 | 52.47 | 2.07  | 52.5  | 1.5  | 0.06 |
| Length56 | 14.14 | 0.98 | 14.17 | 49.41 | 3.97  | 49.53 | 1.51 | 0.07 |
| Length57 | 15.72 | 0.49 | 15.73 | 60.5  | 1.79  | 60.52 | 1.48 | 0.04 |
| Length58 | 11.57 | 2.94 | 11.94 | 64.43 | 14.28 | 65.27 | 1.48 | 0.04 |
| Length59 | 16.3  | 0.98 | 16.33 | 45.68 | 3.45  | 45.78 | 1.67 | 0.05 |
| Length60 | 12.93 | 0    | 12.93 | 75.44 | 0     | 75.44 | 1.44 | 0.13 |
| Length61 | 14.33 | 0.98 | 14.37 | 44.22 | 3.92  | 44.35 | 1.44 | 0.08 |
| Length62 | 13.53 | 2.94 | 13.84 | 88.25 | 12.28 | 88.29 | 1.44 | 0.08 |
| Length63 | 14.12 | 1.96 | 14.25 | 83.58 | 7.92  | 83.64 | 1.63 | 0.07 |
| Length64 | 13.83 | 0.49 | 13.84 | 60.73 | 2.03  | 60.75 | 1.63 | 0.07 |
| Length65 | 14.58 | 0    | 14.58 | 28.95 | 0     | 28.95 | 1.66 | 0.14 |
| Length66 | 14.44 | 0    | 14.44 | 76.86 | 0     | 76.86 | 1.66 | 0.14 |
| Length67 | 13.82 | 1.47 | 13.9  | 70.86 | 6.08  | 70.97 | 1.66 | 0.14 |
| Length68 | 13.1  | 0    | 13.1  | 68.77 | 0     | 68.77 | 1.66 | 0.14 |
| Length69 | 13.28 | 0.49 | 13.29 | 69.88 | 2.12  | 69.89 | 1.66 | 0.14 |
| Length70 | 13.61 | 0.98 | 13.64 | 64.12 | 4.13  | 64.19 | 1.66 | 0.14 |
| Length71 | 12.94 | 1.47 | 13.03 | 63.33 | 6.49  | 63.51 | 1.6  | 0.12 |
| Length72 | 9.4   | 1.96 | 9.61  | 66.23 | 11.79 | 66.76 | 1.68 | 0.09 |
| Length73 | 13.2  | 2.94 | 13.52 | 83.95 | 12.58 | 84.1  | 1.68 | 0.09 |
| Length74 | 10.03 | 1.96 | 10.22 | 15.7  | 11.08 | 19.14 | 1.68 | 0.09 |
| Length75 | 10.56 | 0    | 10.56 | 51.55 | 0     | 51.55 | 1.68 | 0.09 |
| Length76 | 10.58 | 3.93 | 11.29 | 49.75 | 20.36 | 52.71 | 1.79 | 0.1  |
| Length77 | 11.92 | 2.45 | 12.17 | 67.45 | 11.63 | 67.94 | 1.63 | 0.08 |
| Length78 | 13    | 1.96 | 13.15 | 67.56 | 8.59  | 67.82 | 1.46 | 0.08 |
| Length79 | 13.35 | 5.4  | 14.4  | 43.02 | 22.01 | 47.33 | 1.46 | 0.08 |
| Length80 | 13.73 | 0    | 13.73 | 52.57 | 0     | 52.57 | 1.46 | 0.08 |
| Length81 | 9.57  | 1.96 | 9.77  | 70.05 | 11.59 | 70.47 | 1.46 | 0.08 |
| Length82 | 13.46 | 0.98 | 13.5  | 77.76 | 4.17  | 77.8  | 1.46 | 0.08 |
| Length83 | 12.66 | 0.98 | 12.7  | 43.81 | 4.43  | 43.99 | 1.66 | 0.03 |
| Length84 | 13.11 | 1.47 | 13.2  | 51.67 | 6.41  | 51.95 | 1.66 | 0.03 |

Sample ZG01, Apatite Fission-Track Age Data

| No. | Ns  | Area<br>(10 <sup>-5</sup> cm <sup>2</sup> ) | Qs<br>(10 <sup>5</sup> cm <sup>-2</sup> ) | <sup>238</sup> U<br>(ppm) | 1σ   | Dpar (μm)   | Age (Ma) | 1σ    | Length (μm) | N |
|-----|-----|---------------------------------------------|-------------------------------------------|---------------------------|------|-------------|----------|-------|-------------|---|
| 1   | 50  | 5.77                                        | 8.67                                      | 23.20                     | 1.40 | 1.86 ± 0.07 | 74.36    | 11.43 | 0–1         | 0 |
| 2   | 61  | 6.28                                        | 9.71                                      | 46.00                     | 3.50 | 1.77 ± 0.08 | 42.10    | 6.27  | 1–2         | 0 |
| 3   | 25  | 4.59                                        | 5.45                                      | 27.60                     | 1.40 | 1.69 ± 0.12 | 39.40    | 8.13  | 2–3         | 0 |
| 4   | 101 | 8.74                                        | 11.56                                     | 45.70                     | 1.80 | 1.90 ± 0.09 | 50.42    | 5.40  | 3–4         | 0 |
| 5   | 35  | 5.60                                        | 6.26                                      | 19.50                     | 1.20 | 1.74 ± 0.17 | 63.92    | 11.50 | 4–5         | 0 |
| 6   | 26  | 6.57                                        | 3.96                                      | 11.04                     | 0.77 | 1.98 ± 0.10 | 71.37    | 14.86 | 5–6         | 0 |
| 7   | 60  | 8.55                                        | 7.01                                      | 23.80                     | 1.50 | 1.65 ± 0.15 | 58.71    | 8.43  | 6–7         | 0 |

|     |    |       |       |       |       |             |       |       |             |    |
|-----|----|-------|-------|-------|-------|-------------|-------|-------|-------------|----|
| 8   | 73 | 4.02  | 18.16 | 85.70 | 4.10  | 1.75 ± 0.16 | 42.27 | 5.34  | 7–8         | 0  |
| 9   | 45 | 5.11  | 8.82  | 26.40 | 1.50  | 1.65 ± 0.17 | 66.48 | 10.61 | 8–9         | 0  |
| 10  | 4  | 5.82  | 0.69  | 2.68  | 0.34  | 1.63 ± 0.26 | 51.13 | 26.38 | 9–10        | 3  |
| 11  | 13 | 3.95  | 3.29  | 9.30  | 0.64  | 1.64 ± 0.14 | 70.43 | 20.13 | 10–11       | 4  |
| 12  | 4  | 5.44  | 0.74  | 1.57  | 0.20  | 1.87 ± 0.16 | 93.14 | 48.06 | 11–12       | 9  |
| 13  | 55 | 4.39  | 12.54 | 39.40 | 2.40  | 1.83 ± 0.14 | 63.38 | 9.38  | 12–13       | 12 |
| 14  | 41 | 3.76  | 10.92 | 50.00 | 2.80  | 1.83 ± 0.14 | 43.56 | 7.23  | 13–14       | 34 |
| 15  | 14 | 2.96  | 4.74  | 24.90 | 1.70  | 1.72 ± 0.14 | 37.97 | 10.47 | 14–15       | 15 |
| 16  | 36 | 2.98  | 12.09 | 44.90 | 2.60  | 2.01 ± 0.07 | 53.66 | 9.47  | 15–16       | 6  |
| 17  | 41 | 2.51  | 16.31 | 46.50 | 2.90  | 1.67 ± 0.19 | 69.81 | 11.74 | 16–17       | 1  |
| 18  | 16 | 2.04  | 7.85  | 27.10 | 1.80  | 1.78 ± 0.14 | 57.70 | 14.93 | 17–18       | 0  |
| 19  | 18 | 2.19  | 8.24  | 24.00 | 1.50  | 1.65 ± 0.24 | 68.34 | 16.66 | 18–19       | 0  |
| 20  | 44 | 3.17  | 13.89 | 39.60 | 2.10  | 1.61 ± 0.19 | 69.81 | 11.16 | 19–20       | 0  |
| 21  | 2  | 2.69  | 0.75  | 2.42  | 0.25  | 1.77 ± 0.13 | 61.30 | 43.80 | MTL = 13.21 |    |
| 22  | 70 | 8.01  | 8.74  | 26.10 | 1.40  | 1.79 ± 0.10 | 66.64 | 8.73  | Var = 0.16  |    |
| 23  | 12 | 4.42  | 2.72  | 9.41  | 0.75  | 1.66 ± 0.17 | 57.55 | 17.23 | SD = 1.44   |    |
| 24  | 4  | 4.75  | 0.84  | 2.48  | 0.29  | 1.61 ± 0.16 | 67.58 | 34.70 | N = 84      |    |
| 25  | 55 | 6.28  | 8.77  | 30.00 | 1.70  | 1.82 ± 0.16 | 58.21 | 8.51  |             |    |
| 26  | 6  | 2.88  | 2.08  | 5.80  | 0.53  | 1.64 ± 0.14 | 71.47 | 29.90 |             |    |
| 911 |    | 123.4 | 7.49  | 26.73 | 19.57 | 1.75 ± 0.11 |       |       |             |    |

Pooled Age = 55.6 ± 2.5 Ma

Central Age = 57.3 ± 2.6 Ma

## Sample ZG07, Apatite Fission-Track Length Data.

| ID       | L <sub>App</sub><br>(μm) | Dz<br>(μm) | L <sub>True</sub><br>(μm) | Azimuth | Dip   | Angle | DPar<br>(μm) | SD   |
|----------|--------------------------|------------|---------------------------|---------|-------|-------|--------------|------|
| Length01 | 13.92                    | 1.47       | 14                        | 71.73   | 6.04  | 71.84 | 1.56         | 0.13 |
| Length02 | 12.18                    | 0          | 12.18                     | 50.33   | 0     | 50.33 | 1.56         | 0.13 |
| Length03 | 14.64                    | 1.96       | 14.77                     | 26.55   | 7.64  | 27.55 | 1.6          | 0.19 |
| Length04 | 12.03                    | 0          | 12.03                     | 71.75   | 0     | 71.75 | 1.61         | 0.08 |
| Length05 | 13.41                    | 0          | 13.41                     | 21.63   | 0     | 21.63 | 1.43         | 0.07 |
| Length06 | 12.16                    | 0.98       | 12.19                     | 44.47   | 4.62  | 44.66 | 1.43         | 0.07 |
| Length07 | 13.25                    | 0          | 13.25                     | 73.08   | 0     | 73.08 | 1.44         | 0.17 |
| Length08 | 14.83                    | 0          | 14.83                     | 87.14   | 0     | 87.14 | 1.72         | 0.13 |
| Length09 | 15.3                     | 0.49       | 15.31                     | 75.52   | 1.84  | 75.52 | 1.72         | 0.13 |
| Length10 | 12.94                    | 0.49       | 12.95                     | 72.3    | 2.17  | 72.32 | 1.68         | 0.11 |
| Length11 | 15.71                    | 0          | 15.71                     | 69.2    | 0     | 69.2  | 1.25         | 0.1  |
| Length12 | 15.1                     | 0          | 15.1                      | 63.36   | 0     | 63.36 | 1.25         | 0.1  |
| Length13 | 15.3                     | 0.49       | 15.31                     | 31.41   | 1.84  | 31.46 | 1.55         | 0.09 |
| Length14 | 12.8                     | 0.98       | 12.83                     | 45.88   | 4.39  | 46.04 | 1.51         | 0.11 |
| Length15 | 13.42                    | 1.96       | 13.56                     | 71.06   | 8.33  | 71.27 | 1.44         | 0.09 |
| Length16 | 13.13                    | 0.49       | 13.14                     | 32      | 2.14  | 32.07 | 1.44         | 0.09 |
| Length17 | 13.45                    | 2.94       | 13.77                     | 69.31   | 12.35 | 69.81 | 1.54         | 0.04 |
| Length18 | 13.24                    | 0          | 13.24                     | 66.18   | 0     | 66.18 | 1.56         | 0.07 |
| Length19 | 13.24                    | 0.49       | 13.24                     | 60.86   | 2.12  | 60.88 | 1.6          | 0.16 |
| Length20 | 15.33                    | 1.47       | 15.4                      | 11.18   | 5.48  | 12.43 | 1.6          | 0.16 |
| Length21 | 12.75                    | 0          | 12.75                     | 69.99   | 0     | 69.99 | 1.6          | 0.16 |
| Length22 | 11.49                    | 2.45       | 11.75                     | 54.82   | 12.06 | 55.71 | 1.59         | 0.07 |
| Length23 | 13.04                    | 3.44       | 13.48                     | 72.09   | 14.76 | 72.71 | 1.59         | 0.07 |
| Length24 | 13.24                    | 2.94       | 13.56                     | 58.33   | 12.54 | 59.17 | 1.73         | 0.19 |
| Length25 | 13.47                    | 0.98       | 13.51                     | 87.21   | 4.17  | 87.22 | 1.5          | 0.04 |
| Length26 | 11.83                    | 0.49       | 11.84                     | 68.88   | 2.38  | 68.9  | 1.68         | 0.19 |
| Length27 | 14.34                    | 0          | 14.34                     | 34.4    | 0     | 34.4  | 1.7          | 0.16 |

|          |       |      |       |       |       |       |      |      |
|----------|-------|------|-------|-------|-------|-------|------|------|
| Length28 | 11.14 | 3.44 | 11.66 | 31.8  | 17.14 | 35.7  | 1.7  | 0.16 |
| Length29 | 12.38 | 0.98 | 12.42 | 38.17 | 4.53  | 38.39 | 1.66 | 0.21 |
| Length30 | 13.03 | 1.96 | 13.18 | 58.18 | 8.57  | 58.57 | 1.6  | 0.11 |
| Length31 | 14.32 | 0    | 14.32 | 44.01 | 0     | 44.01 | 1.78 | 0.1  |
| Length32 | 12.06 | 0    | 12.06 | 65.48 | 0     | 65.48 | 1.74 | 0.11 |
| Length33 | 14.42 | 0    | 14.42 | 74.89 | 0     | 74.89 | 1.74 | 0.11 |
| Length34 | 13.79 | 0    | 13.79 | 73.67 | 0     | 73.67 | 1.74 | 0.11 |
| Length35 | 11.75 | 2.94 | 12.12 | 79.8  | 14.07 | 80.11 | 1.74 | 0.11 |
| Length36 | 9.7   | 0    | 9.7   | 9.69  | 0     | 9.69  | 1.62 | 0.15 |
| Length37 | 17.11 | 0.98 | 17.14 | 82.59 | 3.28  | 82.6  | 1.76 | 0.04 |
| Length38 | 13.8  | 0    | 13.8  | 65.11 | 0     | 65.11 | 1.74 | 0.1  |
| Length39 | 14.61 | 1.47 | 14.69 | 48.67 | 5.75  | 48.92 | 1.44 | 0.06 |
| Length40 | 11.6  | 0.49 | 11.61 | 75.84 | 2.42  | 75.85 | 1.56 | 0.1  |
| Length41 | 12.66 | 0.49 | 12.67 | 24.47 | 2.22  | 24.56 | 1.5  | 0.09 |
| Length42 | 13.9  | 0    | 13.9  | 79.24 | 0     | 79.24 | 1.5  | 0.09 |
| Length43 | 9.59  | 0    | 9.59  | 78.87 | 0     | 78.87 | 1.6  | 0.13 |
| Length44 | 12.8  | 0.49 | 12.81 | 67.66 | 2.2   | 67.68 | 1.64 | 0.18 |
| Length45 | 11.13 | 0    | 11.13 | 31.47 | 0     | 31.47 | 1.64 | 0.18 |
| Length46 | 13.39 | 0    | 13.39 | 46.99 | 0     | 46.99 | 1.64 | 0.18 |
| Length47 | 13.34 | 0    | 13.34 | 41.91 | 0     | 41.91 | 1.64 | 0.18 |
| Length48 | 10.04 | 6.87 | 12.17 | 5.91  | 34.39 | 34.83 | 1.64 | 0.18 |
| Length49 | 14.63 | 0.98 | 14.66 | 47.27 | 3.84  | 47.38 | 1.64 | 0.07 |
| Length50 | 13.31 | 1.47 | 13.4  | 72.17 | 6.31  | 72.28 | 1.64 | 0.07 |
| Length51 | 13.36 | 0    | 13.36 | 70.51 | 0     | 70.51 | 1.85 | 0.16 |
| Length52 | 14.44 | 0    | 14.44 | 12.05 | 0     | 12.05 | 1.85 | 0.16 |
| Length53 | 14.42 | 0    | 14.42 | 2.13  | 0     | 2.13  | 1.85 | 0.16 |
| Length54 | 14.53 | 2.94 | 14.83 | 42.2  | 11.46 | 43.44 | 1.85 | 0.16 |
| Length55 | 14.19 | 1.96 | 14.32 | 81.72 | 7.88  | 81.8  | 1.85 | 0.16 |
| Length56 | 11.74 | 0    | 11.74 | 16.35 | 0     | 16.35 | 1.75 | 0.05 |
| Length57 | 13.38 | 0.98 | 13.41 | 71.43 | 4.2   | 71.48 | 1.72 | 0.05 |
| Length58 | 12.72 | 0.98 | 12.75 | 49.48 | 4.41  | 49.63 | 1.72 | 0.05 |
| Length59 | 13.94 | 1.96 | 14.08 | 75.14 | 8.02  | 75.28 | 1.72 | 0.07 |
| Length60 | 10.44 | 0.98 | 10.49 | 82.72 | 5.37  | 82.75 | 1.7  | 0.1  |
| Length61 | 13.21 | 0    | 13.21 | 29.98 | 0     | 29.98 | 1.7  | 0.1  |
| Length62 | 14.02 | 1.96 | 14.16 | 66.17 | 7.97  | 66.41 | 1.63 | 0.05 |
| Length63 | 13.99 | 0    | 13.99 | 46.83 | 0     | 46.83 | 1.63 | 0.05 |
| Length64 | 10.24 | 0    | 10.24 | 78.35 | 0     | 78.35 | 1.39 | 0.1  |
| Length65 | 13.68 | 0    | 13.68 | 64.68 | 0     | 64.68 | 1.8  | 0.09 |
| Length66 | 10.35 | 1.47 | 10.46 | 49.92 | 8.09  | 50.4  | 1.67 | 0.17 |
| Length67 | 13.68 | 0.98 | 13.71 | 47.82 | 4.1   | 47.95 | 1.6  | 0.12 |
| Length68 | 13.28 | 0    | 13.28 | 44.44 | 0     | 44.44 | 1.7  | 0.07 |
| Length69 | 14.31 | 3.93 | 14.84 | 47.95 | 15.34 | 49.77 | 1.47 | 0.12 |
| Length70 | 13.68 | 3.93 | 14.24 | 85.31 | 16.01 | 85.49 | 1.57 | 0.12 |
| Length71 | 14.61 | 1.96 | 14.74 | 62.15 | 7.65  | 62.42 | 1.69 | 0.17 |
| Length72 | 11.59 | 2.45 | 11.85 | 73.36 | 11.95 | 73.73 | 1.64 | 0.14 |
| Length73 | 14.7  | 1.47 | 14.77 | 55.94 | 5.72  | 56.14 | 1.59 | 0.11 |
| Length74 | 13.58 | 0    | 13.58 | 87.42 | 0     | 87.42 | 1.63 | 0.05 |
| Length75 | 13.74 | 2.45 | 13.96 | 89.02 | 10.12 | 89.03 | 1.73 | 0.08 |
| Length76 | 12.99 | 1.96 | 13.14 | 48.76 | 8.59  | 49.32 | 1.78 | 0.12 |
| Length77 | 14.42 | 0.49 | 14.43 | 48.19 | 1.95  | 48.22 | 1.62 | 0.05 |
| Length78 | 14.42 | 0    | 14.42 | 32.36 | 0     | 32.36 | 1.62 | 0.05 |
| Length79 | 13.02 | 0.49 | 13.03 | 81.69 | 2.16  | 81.69 | 1.59 | 0.07 |
| Length80 | 14.37 | 0    | 14.37 | 53.41 | 0     | 53.41 | 1.65 | 0.1  |

|           |       |      |       |       |       |       |      |      |
|-----------|-------|------|-------|-------|-------|-------|------|------|
| Length81  | 13.1  | 0    | 13.1  | 44.35 | 0     | 44.35 | 1.6  | 0.11 |
| Length82  | 14.49 | 1.96 | 14.63 | 82.65 | 7.71  | 82.71 | 1.65 | 0.08 |
| Length83  | 14.64 | 1.47 | 14.71 | 36.85 | 5.74  | 37.23 | 1.57 | 0.08 |
| Length84  | 15.81 | 0    | 15.81 | 38.63 | 0     | 38.63 | 1.57 | 0.08 |
| Length85  | 14.01 | 1.96 | 14.15 | 48.89 | 7.97  | 49.37 | 1.74 | 0.11 |
| Length86  | 12.66 | 0.98 | 12.7  | 60.26 | 4.43  | 60.36 | 1.74 | 0.11 |
| Length87  | 11.34 | 0.98 | 11.38 | 24.41 | 4.95  | 24.88 | 1.76 | 0.13 |
| Length88  | 12.23 | 3.44 | 12.7  | 78.59 | 15.69 | 79.02 | 1.66 | 0.1  |
| Length89  | 10.85 | 2.45 | 11.13 | 69.62 | 12.74 | 70.15 | 1.79 | 0.17 |
| Length90  | 16.1  | 0.98 | 16.12 | 40.14 | 3.49  | 40.26 | 1.72 | 0.12 |
| Length91  | 10.6  | 4.42 | 11.49 | 76.77 | 22.61 | 77.81 | 1.63 | 0.08 |
| Length92  | 10.7  | 0.98 | 10.74 | 29.7  | 5.24  | 30.12 | 1.68 | 0.22 |
| Length93  | 12.79 | 0.49 | 12.8  | 56.46 | 2.2   | 56.49 | 1.8  | 0.05 |
| Length94  | 13.87 | 2.45 | 14.08 | 83.48 | 10.04 | 83.58 | 1.61 | 0.08 |
| Length95  | 12.7  | 1.47 | 12.79 | 77.5  | 6.61  | 77.59 | 1.78 | 0.18 |
| Length96  | 12.95 | 0.98 | 12.99 | 42.94 | 4.33  | 43.12 | 1.62 | 0.12 |
| Length97  | 14    | 3.93 | 14.54 | 53.28 | 15.67 | 54.85 | 1.67 | 0.19 |
| Length98  | 11.84 | 2.45 | 12.09 | 88.12 | 11.71 | 88.16 | 1.72 | 0.06 |
| Length99  | 13.99 | 2.45 | 14.2  | 28.16 | 9.95  | 29.73 | 1.72 | 0.06 |
| Length100 | 14.39 | 1.47 | 14.46 | 75.74 | 5.84  | 75.82 | 1.65 | 0.08 |
| Length101 | 12.88 | 1.47 | 12.97 | 51.57 | 6.52  | 51.86 | 1.65 | 0.08 |
| Length102 | 14.19 | 1.47 | 14.26 | 52.45 | 5.93  | 52.68 | 1.72 | 0.1  |

Sample ZG07, Apatite Fission-Track Age Data

| No. | Ns  | Area<br>(10 <sup>-5</sup> cm <sup>2</sup> ) | Qs<br>(10 <sup>5</sup> cm <sup>-2</sup> ) | <sup>238</sup> U<br>(ppm) | 1σ   | Dpar (μm)   | Age (Ma) | 1σ    | Length (μm) | N  |
|-----|-----|---------------------------------------------|-------------------------------------------|---------------------------|------|-------------|----------|-------|-------------|----|
| 1   | 42  | 2.94                                        | 14.27                                     | 62.30                     | 4.30 | 1.68 ± 0.10 | 45.68    | 7.72  | 0–1         | 0  |
| 2   | 43  | 2.57                                        | 16.75                                     | 73.00                     | 4.60 | 1.86 ± 0.04 | 45.76    | 7.55  | 1–2         | 0  |
| 3   | 24  | 2.34                                        | 10.26                                     | 43.60                     | 2.70 | 1.75 ± 0.11 | 46.92    | 10.01 | 2–3         | 0  |
| 4   | 37  | 1.56                                        | 23.75                                     | 83.10                     | 4.90 | 1.70 ± 0.04 | 56.94    | 9.95  | 3–4         | 0  |
| 5   | 29  | 2.10                                        | 13.85                                     | 56.70                     | 5.20 | 1.62 ± 0.09 | 48.70    | 10.09 | 4–5         | 0  |
| 6   | 12  | 3.83                                        | 3.131                                     | 12.60                     | 1.00 | 1.75 ± 0.09 | 49.54    | 14.83 | 5–6         | 0  |
| 7   | 19  | 2.56                                        | 7.555                                     | 30.30                     | 1.70 | 1.76 ± 0.10 | 49.71    | 11.74 | 6–7         | 0  |
| 8   | 156 | 9.89                                        | 15.77                                     | 42.30                     | 2.80 | 1.78 ± 0.12 | 74.18    | 7.71  | 7–8         | 0  |
| 9   | 46  | 3.63                                        | 12.67                                     | 54.90                     | 3.40 | 1.79 ± 0.06 | 46.02    | 7.36  | 8–9         | 0  |
| 10  | 48  | 3.62                                        | 13.26                                     | 41.10                     | 2.80 | 1.67 ± 0.15 | 64.24    | 10.25 | 9–10        | 2  |
| 11  | 30  | 2.52                                        | 11.92                                     | 38.90                     | 2.20 | 1.72 ± 0.20 | 61.03    | 11.67 | 10–11       | 4  |
| 12  | 63  | 3.06                                        | 20.59                                     | 75.90                     | 4.40 | 1.81 ± 0.07 | 54.06    | 7.50  | 11–12       | 10 |
| 13  | 4   | 3.11                                        | 1.285                                     | 3.53                      | 0.33 | 1.75 ± 0.08 | 72.44    | 36.85 | 12–13       | 20 |
| 14  | 13  | 1.75                                        | 7.445                                     | 23.20                     | 1.30 | 1.82 ± 0.16 | 63.90    | 18.08 | 13–14       | 29 |
| 15  | 34  | 3.75                                        | 9.078                                     | 26.80                     | 2.20 | 1.77 ± 0.18 | 67.43    | 12.82 | 14–15       | 29 |
| 16  | 54  | 4.67                                        | 11.55                                     | 48.30                     | 3.00 | 1.82 ± 0.09 | 47.68    | 7.13  | 15–16       | 6  |
| 17  | 24  | 8.25                                        | 2.909                                     | 7.69                      | 0.61 | 1.59 ± 0.12 | 75.26    | 16.48 | 16–17       | 1  |
| 18  | 9   | 3.95                                        | 2.278                                     | 9.41                      | 0.53 | 1.69 ± 0.21 | 48.26    | 16.32 | 17–18       | 1  |
| 19  | 39  | 4.06                                        | 9.613                                     | 32.00                     | 1.70 | 1.71 ± 0.12 | 59.84    | 10.10 | 18–19       | 0  |
| 20  | 8   | 1.49                                        | 5.383                                     | 16.90                     | 1.30 | 1.77 ± 0.09 | 63.43    | 22.95 | 19–20       | 0  |
| 21  | 36  | 2.99                                        | 12.06                                     | 41.50                     | 2.50 | 1.62 ± 0.10 | 57.89    | 10.26 | MTL = 13.36 |    |
| 22  | 44  | 4.27                                        | 10.31                                     | 42.50                     | 3.10 | 1.73 ± 0.10 | 48.36    | 8.10  | Var = 0.14  |    |
| 23  | 30  | 3.83                                        | 7.836                                     | 27.10                     | 1.70 | 1.84 ± 0.04 | 57.61    | 11.12 | SD = 1.39   |    |
| 24  | 32  | 2.59                                        | 12.37                                     | 52.00                     | 2.80 | 1.79 ± 0.07 | 47.43    | 8.76  | N = 102     |    |
| 25  | 77  | 3.78                                        | 20.35                                     | 53.50                     | 3.00 | 1.87 ± 0.04 | 75.67    | 9.61  |             |    |
| 26  | 29  | 3.95                                        | 7.351                                     | 20.90                     | 1.50 | 1.72 ± 0.16 | 70.01    | 13.94 |             |    |
| 27  | 17  | 2.66                                        | 6.390                                     | 20.50                     | 1.30 | 1.75 ± 0.08 | 62.08    | 15.56 |             |    |

|      |    |       |       |       |       |             |       |       |
|------|----|-------|-------|-------|-------|-------------|-------|-------|
| 28   | 30 | 3.72  | 8.064 | 31.50 | 2.00  | 1.71 ± 0.08 | 51.03 | 9.86  |
| 29   | 38 | 3.98  | 9.551 | 23.60 | 1.50  | 1.74 ± 0.16 | 80.48 | 14.02 |
| 30   | 86 | 7.68  | 11.20 | 37.40 | 2.30  | 1.65 ± 0.07 | 59.65 | 7.41  |
| 31   | 36 | 2.00  | 17.98 | 54.20 | 4.40  | 1.66 ± 0.06 | 66.05 | 12.24 |
| 32   | 63 | 3.74  | 16.83 | 46.60 | 2.60  | 1.68 ± 0.10 | 71.87 | 9.90  |
| 33   | 11 | 1.00  | 11.00 | 45.00 | 2.40  | 1.81 ± 0.11 | 48.73 | 14.92 |
| 34   | 56 | 4.12  | 13.49 | 53.10 | 3.00  | 1.85 ± 0.16 | 50.64 | 7.35  |
| 35   | 33 | 2.34  | 13.79 | 48.60 | 3.10  | 1.60 ± 0.12 | 56.53 | 10.48 |
| 36   | 33 | 2.58  | 12.81 | 48.50 | 2.80  | 1.77 ± 0.07 | 52.64 | 9.65  |
| 1385 |    | 126.9 | 11.24 | 39.70 | 19.06 | 1.74 ± 0.07 |       |       |

Pooled Age = 58.1 ± 1.7 Ma

Central Age = 58.1 ± 1.9 Ma

## Sample ZG08, Apatite Fission-Track Length Data.

| ID       | L <sub>App</sub><br>(μm) | Dz<br>(μm) | L <sub>True</sub><br>(μm) | Azimuth | Dip  | Angle | DPar<br>(μm) | SD   |
|----------|--------------------------|------------|---------------------------|---------|------|-------|--------------|------|
| Length01 | 12.34                    | 1.96       | 12.5                      | 53.97   | 9.04 | 54.48 | 1.71         | 0.05 |
| Length02 | 15.58                    | 1.47       | 15.65                     | 45.09   | 5.4  | 45.35 | 1.64         | 0.06 |
| Length03 | 9.45                     | 0          | 9.45                      | 57.86   | 0    | 57.86 | 1.75         | 0.07 |
| Length04 | 14.36                    | 2.45       | 14.57                     | 50.94   | 9.69 | 51.6  | 1.75         | 0.07 |
| Length05 | 9.41                     | 0          | 9.41                      | 35.36   | 0    | 35.36 | 1.75         | 0.07 |
| Length06 | 14.69                    | 0          | 14.69                     | 79.05   | 0    | 79.05 | 1.77         | 0.22 |
| Length07 | 14.03                    | 0          | 14.03                     | 40.48   | 0    | 40.48 | 1.77         | 0.22 |
| Length08 | 13.44                    | 0          | 13.44                     | 70.82   | 0    | 70.82 | 1.74         | 0.09 |
| Length09 | 11.5                     | 1.47       | 11.59                     | 44.94   | 7.3  | 45.4  | 1.77         | 0.1  |
| Length10 | 11.48                    | 0.98       | 11.53                     | 79.95   | 4.89 | 79.99 | 1.72         | 0.05 |
| Length11 | 11.47                    | 1.96       | 11.64                     | 74.22   | 9.71 | 74.45 | 1.72         | 0.05 |
| Length12 | 11.53                    | 0          | 11.53                     | 71.58   | 0    | 71.58 | 1.78         | 0.02 |
| Length13 | 13.97                    | 1.47       | 14.05                     | 53.01   | 6.02 | 53.25 | 1.76         | 0.28 |
| Length14 | 11.76                    | 1.96       | 11.93                     | 28.21   | 9.48 | 29.63 | 1.76         | 0.28 |
| Length15 | 14.81                    | 0.98       | 14.84                     | 36.21   | 3.79 | 36.39 | 1.76         | 0.28 |
| Length16 | 12.06                    | 0.49       | 12.07                     | 4.04    | 2.33 | 4.67  | 1.82         | 0.07 |
| Length17 | 14.37                    | 2.45       | 14.58                     | 51.32   | 9.69 | 51.97 | 1.82         | 0.07 |
| Length18 | 15.09                    | 0          | 15.09                     | 55.53   | 0    | 55.53 | 1.82         | 0.07 |
| Length19 | 11.87                    | 1.96       | 12.03                     | 30.38   | 9.39 | 31.66 | 1.71         | 0.11 |
| Length20 | 15.5                     | 0.98       | 15.53                     | 56.09   | 3.62 | 56.17 | 1.79         | 0.1  |
| Length21 | 14.86                    | 1.96       | 14.99                     | 72.97   | 7.52 | 73.12 | 1.56         | 0.08 |
| Length22 | 13.58                    | 0.49       | 13.59                     | 55.87   | 2.07 | 55.9  | 1.7          | 0.1  |
| Length23 | 13.27                    | 1.47       | 13.35                     | 63.16   | 6.33 | 63.33 | 1.63         | 0.12 |
| Length24 | 12.05                    | 0.98       | 12.09                     | 68.75   | 4.66 | 68.82 | 1.63         | 0.12 |
| Length25 | 12.67                    | 0.49       | 12.68                     | 62.69   | 2.22 | 62.71 | 1.71         | 0.08 |
| Length26 | 9.95                     | 0          | 9.95                      | 83.71   | 0    | 83.71 | 1.71         | 0.09 |
| Length27 | 16.03                    | 0.49       | 16.03                     | 13.77   | 1.75 | 13.88 | 1.66         | 0.06 |
| Length28 | 12.53                    | 0.49       | 12.54                     | 60.11   | 2.24 | 60.14 | 1.67         | 0.15 |
| Length29 | 14.19                    | 0          | 14.19                     | 63.28   | 0    | 63.28 | 1.62         | 0.15 |
| Length30 | 10.51                    | 0          | 10.51                     | 60.67   | 0    | 60.67 | 1.59         | 0.07 |
| Length31 | 15.26                    | 0.98       | 15.3                      | 55.35   | 3.68 | 55.43 | 1.64         | 0.1  |
| Length32 | 14.58                    | 0.49       | 14.59                     | 34.07   | 1.93 | 34.11 | 1.64         | 0.1  |
| Length33 | 15.65                    | 1.96       | 15.77                     | 34.42   | 7.15 | 35.07 | 1.64         | 0.1  |
| Length34 | 14.58                    | 0.98       | 14.61                     | 59.94   | 3.85 | 60.01 | 1.64         | 0.1  |
| Length35 | 15.15                    | 0.98       | 15.18                     | 40.92   | 3.71 | 41.06 | 1.64         | 0.1  |
| Length36 | 12.89                    | 0.49       | 12.9                      | 80.39   | 2.18 | 80.4  | 1.64         | 0.1  |
| Length37 | 13.15                    | 0          | 13.15                     | 9.58    | 0    | 9.58  | 1.69         | 0.11 |

|          |       |      |       |       |       |       |      |      |
|----------|-------|------|-------|-------|-------|-------|------|------|
| Length38 | 13.03 | 4.42 | 13.76 | 58.56 | 18.73 | 60.4  | 1.69 | 0.11 |
| Length39 | 13.97 | 1.96 | 14.11 | 77.27 | 8     | 77.4  | 1.7  | 0.1  |
| Length40 | 11.1  | 0.98 | 11.14 | 6.94  | 5.05  | 8.58  | 1.7  | 0.1  |
| Length41 | 15.84 | 0.98 | 15.87 | 25.92 | 3.55  | 26.15 | 1.75 | 0.11 |
| Length42 | 11.71 | 0    | 11.71 | 45.96 | 0     | 45.96 | 1.75 | 0.11 |
| Length43 | 11.25 | 0.49 | 11.26 | 72.79 | 2.5   | 72.8  | 1.75 | 0.11 |
| Length44 | 15.76 | 0.49 | 15.77 | 54.37 | 1.78  | 54.39 | 1.64 | 0.17 |
| Length45 | 13.46 | 2.45 | 13.68 | 76.5  | 10.33 | 76.72 | 1.64 | 0.17 |
| Length46 | 11.43 | 1.96 | 11.6  | 79.27 | 9.75  | 79.42 | 1.58 | 0.1  |
| Length47 | 12.21 | 0.49 | 12.22 | 12.71 | 2.3   | 12.91 | 1.58 | 0.1  |
| Length48 | 12.19 | 0.49 | 12.2  | 36.2  | 2.31  | 36.26 | 1.58 | 0.1  |
| Length49 | 12.98 | 0.49 | 12.99 | 38.6  | 2.17  | 38.65 | 1.79 | 0.1  |
| Length50 | 14.06 | 0.49 | 14.07 | 25.6  | 2     | 25.68 | 1.76 | 0.04 |
| Length51 | 14.22 | 0    | 14.22 | 30.23 | 0     | 30.23 | 1.67 | 0.08 |
| Length52 | 13.34 | 0.98 | 13.37 | 54.29 | 4.21  | 54.4  | 1.67 | 0.08 |
| Length53 | 15.11 | 0.98 | 15.14 | 14.53 | 3.72  | 14.99 | 1.67 | 0.08 |
| Length54 | 15.56 | 0    | 15.56 | 53.69 | 0     | 53.69 | 1.67 | 0.08 |
| Length55 | 13.45 | 0.98 | 13.48 | 58.03 | 4.18  | 58.13 | 1.67 | 0.08 |
| Length56 | 13.91 | 0.49 | 13.92 | 57.3  | 2.02  | 57.32 | 1.67 | 0.08 |
| Length57 | 12.47 | 0    | 12.47 | 75.86 | 0     | 75.86 | 1.84 | 0.14 |
| Length58 | 12.89 | 2.94 | 13.23 | 14.1  | 12.86 | 19    | 1.84 | 0.14 |
| Length59 | 14.17 | 3.44 | 14.58 | 61.05 | 13.63 | 61.94 | 1.64 | 0.14 |
| Length60 | 12.19 | 2.94 | 12.54 | 82.32 | 13.58 | 82.54 | 1.64 | 0.14 |
| Length61 | 10.42 | 1.96 | 10.6  | 77.92 | 10.67 | 78.13 | 1.64 | 0.14 |
| Length62 | 14.95 | 0.49 | 14.96 | 80.74 | 1.88  | 80.75 | 1.77 | 0.11 |
| Length63 | 15.01 | 1.96 | 15.13 | 69.41 | 7.45  | 69.59 | 1.93 | 0.1  |
| Length64 | 9.35  | 1.96 | 9.56  | 41.94 | 11.86 | 43.29 | 1.93 | 0.1  |
| Length65 | 15.06 | 0.49 | 15.07 | 11.97 | 1.87  | 12.11 | 1.93 | 0.1  |
| Length66 | 12.07 | 0.98 | 12.11 | 68.21 | 4.65  | 68.29 | 1.82 | 0.07 |
| Length67 | 14.81 | 0.49 | 14.82 | 32.76 | 1.9   | 32.81 | 1.82 | 0.07 |
| Length68 | 13.85 | 0.49 | 13.86 | 69.91 | 2.03  | 69.92 | 1.57 | 0.17 |
| Length69 | 13.27 | 0.49 | 13.28 | 78.3  | 2.12  | 78.31 | 1.57 | 0.17 |
| Length70 | 15.79 | 1.96 | 15.91 | 47    | 7.09  | 47.4  | 1.57 | 0.17 |
| Length71 | 12.22 | 2.45 | 12.46 | 3.63  | 11.36 | 11.92 | 1.57 | 0.17 |
| Length72 | 13.45 | 3.44 | 13.88 | 45.95 | 14.33 | 47.65 | 1.57 | 0.17 |
| Length73 | 14.7  | 0.98 | 14.73 | 63.96 | 3.82  | 64.02 | 1.57 | 0.17 |
| Length74 | 14.96 | 1.47 | 15.04 | 61.8  | 5.62  | 61.94 | 1.57 | 0.17 |
| Length75 | 14.89 | 0    | 14.89 | 45.56 | 0     | 45.56 | 1.57 | 0.17 |
| Length76 | 16.77 | 1.47 | 16.83 | 45.87 | 5.02  | 46.08 | 1.57 | 0.17 |
| Length77 | 13.72 | 2.94 | 14.03 | 50.13 | 12.11 | 51.19 | 1.93 | 0.19 |
| Length78 | 14.48 | 0.98 | 14.51 | 46.47 | 3.88  | 46.6  | 1.55 | 0.03 |
| Length79 | 14.56 | 0.98 | 14.6  | 87.2  | 3.86  | 87.21 | 1.75 | 0.15 |
| Length80 | 12.51 | 0.49 | 12.52 | 42.38 | 2.25  | 42.42 | 1.75 | 0.15 |
| Length81 | 12.99 | 0.49 | 13    | 71.64 | 2.16  | 71.65 | 1.6  | 0.05 |
| Length82 | 14.78 | 1.47 | 14.85 | 19.15 | 5.69  | 19.94 | 1.6  | 0.05 |
| Length83 | 12.19 | 0    | 12.19 | 66.61 | 0     | 66.61 | 1.6  | 0.05 |
| Length84 | 15    | 0    | 15    | 85.48 | 0     | 85.48 | 1.76 | 0.13 |
| Length85 | 12.91 | 0.49 | 12.91 | 50.3  | 2.18  | 50.34 | 1.76 | 0.13 |
| Length86 | 13.36 | 1.96 | 13.51 | 31.8  | 8.36  | 32.77 | 1.76 | 0.13 |
| Length87 | 14.88 | 0.98 | 14.92 | 47.48 | 3.77  | 47.59 | 1.69 | 0.1  |
| Length88 | 15.32 | 1.47 | 15.39 | 60.22 | 5.49  | 60.37 | 1.51 | 0.09 |
| Length89 | 15.24 | 0.49 | 15.25 | 49.42 | 1.84  | 49.45 | 1.44 | 0.13 |
| Length90 | 12.92 | 0    | 12.92 | 37.36 | 0     | 37.36 | 1.71 | 0.1  |

|           |       |      |       |       |       |       |      |      |
|-----------|-------|------|-------|-------|-------|-------|------|------|
| Length91  | 14.37 | 1.47 | 14.45 | 47.41 | 5.85  | 47.69 | 1.71 | 0.1  |
| Length92  | 13.36 | 0.98 | 13.4  | 60.85 | 4.2   | 60.93 | 1.63 | 0.12 |
| Length93  | 13.41 | 0    | 13.41 | 68.37 | 0     | 68.37 | 1.63 | 0.12 |
| Length94  | 16.21 | 1.47 | 16.28 | 11.74 | 5.19  | 12.82 | 1.63 | 0.12 |
| Length95  | 13.84 | 2.94 | 14.15 | 85.05 | 12.01 | 85.16 | 1.63 | 0.12 |
| Length96  | 15.44 | 0    | 15.44 | 78.17 | 0     | 78.17 | 1.63 | 0.12 |
| Length97  | 15.96 | 0.49 | 15.97 | 56.22 | 1.76  | 56.24 | 1.47 | 0.06 |
| Length98  | 13.88 | 0.98 | 13.92 | 66.57 | 4.04  | 66.63 | 1.47 | 0.06 |
| Length99  | 14.93 | 0    | 14.93 | 72.74 | 0     | 72.74 | 1.51 | 0.12 |
| Length100 | 14.17 | 1.47 | 14.24 | 52.56 | 5.93  | 52.8  | 1.71 | 0.1  |
| Length101 | 13.47 | 0    | 13.47 | 29.55 | 0     | 29.55 | 1.71 | 0.1  |
| Length102 | 14.34 | 0    | 14.34 | 39.78 | 0     | 39.78 | 1.64 | 0.1  |
| Length103 | 11.45 | 0    | 11.45 | 10.15 | 0     | 10.15 | 1.64 | 0.1  |
| Length104 | 14.66 | 0.98 | 14.69 | 52.57 | 3.83  | 52.66 | 1.7  | 0.17 |
| Length105 | 14.47 | 1.96 | 14.6  | 42.29 | 7.73  | 42.86 | 1.7  | 0.17 |
| Length106 | 13.06 | 0.49 | 13.07 | 42.63 | 2.15  | 42.68 | 1.7  | 0.17 |
| Length107 | 14.6  | 2.94 | 14.9  | 60.05 | 11.4  | 60.7  | 1.72 | 0.08 |
| Length108 | 15.97 | 0    | 15.97 | 30.96 | 0     | 30.96 | 1.78 | 0.11 |
| Length109 | 14.26 | 2.94 | 14.56 | 60.97 | 11.67 | 61.63 | 1.78 | 0.11 |
| Length110 | 11.49 | 0.98 | 11.53 | 65.88 | 4.88  | 65.97 | 1.64 | 0.08 |
| Length111 | 12.33 | 0.98 | 12.37 | 50.01 | 4.55  | 50.17 | 1.64 | 0.08 |
| Length112 | 12.84 | 2.94 | 13.17 | 48.84 | 12.92 | 50.1  | 1.64 | 0.08 |
| Length113 | 14.61 | 0.98 | 14.64 | 24.69 | 3.84  | 24.97 | 1.75 | 0.18 |
| Length114 | 14.58 | 0.49 | 14.59 | 50.66 | 1.93  | 50.69 | 1.74 | 0.15 |
| Length115 | 12.2  | 0    | 12.2  | 66.02 | 0     | 66.02 | 1.67 | 0.08 |
| Length116 | 14.02 | 2.45 | 14.23 | 72.9  | 9.93  | 73.17 | 1.67 | 0.08 |
| Length117 | 12.55 | 0    | 12.55 | 0.34  | 0     | 0.34  | 1.77 | 0.11 |
| Length118 | 12.91 | 1.96 | 13.05 | 77.86 | 8.65  | 78    | 1.77 | 0.11 |
| Length119 | 14.33 | 0.49 | 14.34 | 57.2  | 1.96  | 57.23 | 1.77 | 0.11 |
| Length120 | 14.87 | 0    | 14.87 | 47.46 | 0     | 47.46 | 1.77 | 0.11 |
| Length121 | 15.04 | 0.98 | 15.07 | 76.98 | 3.73  | 77.01 | 1.71 | 0.14 |

Sample ZG08, Apatite Fission-Track Age Data

| No. | Ns  | Area<br>(10 <sup>-5</sup> cm <sup>2</sup> ) | Qs<br>(10 <sup>5</sup> cm <sup>-2</sup> ) | <sup>238</sup> U(ppm) | 1σ   | Dpar (μm)   | Age (Ma) | 1σ    | Length (μm) | N  |
|-----|-----|---------------------------------------------|-------------------------------------------|-----------------------|------|-------------|----------|-------|-------------|----|
| 1   | 67  | 4.16                                        | 16.10                                     | 52.30                 | 2.20 | 1.41 ± 0.04 | 61.31    | 7.92  | 0–1         | 0  |
| 2   | 120 | 5.59                                        | 21.50                                     | 87.50                 | 5.50 | 1.51 ± 0.07 | 48.99    | 5.43  | 1–2         | 0  |
| 3   | 29  | 2.16                                        | 13.50                                     | 48.60                 | 2.90 | 1.60 ± 0.16 | 55.35    | 10.80 | 2–3         | 0  |
| 4   | 106 | 6.020                                       | 17.60                                     | 59.10                 | 2.40 | 1.63 ± 0.09 | 59.32    | 6.25  | 3–4         | 0  |
| 5   | 32  | 3.00                                        | 10.70                                     | 27.10                 | 1.30 | 1.75 ± 0.22 | 78.53    | 14.39 | 4–5         | 0  |
| 6   | 60  | 5.28                                        | 11.40                                     | 48.60                 | 2.60 | 1.57 ± 0.04 | 46.77    | 6.54  | 5–6         | 0  |
| 7   | 43  | 3.37                                        | 12.80                                     | 48.80                 | 3.00 | 1.66 ± 0.16 | 52.28    | 8.60  | 6–7         | 0  |
| 8   | 57  | 3.00                                        | 19.00                                     | 64.90                 | 3.30 | 1.82 ± 0.04 | 58.32    | 8.27  | 7–8         | 0  |
| 9   | 69  | 4.84                                        | 14.30                                     | 42.40                 | 2.50 | 1.72 ± 0.10 | 67.14    | 9.00  | 8–9         | 0  |
| 10  | 65  | 6.24                                        | 10.40                                     | 38.80                 | 2.10 | 1.59 ± 0.05 | 53.42    | 7.23  | 9–10        | 4  |
| 11  | 46  | 3.11                                        | 14.80                                     | 56.10                 | 3.00 | 1.69 ± 0.03 | 52.58    | 8.25  | 10–11       | 2  |
| 12  | 50  | 2.12                                        | 23.50                                     | 83.10                 | 8.30 | 1.62 ± 0.18 | 56.35    | 9.76  | 11–12       | 11 |
| 13  | 57  | 5.98                                        | 9.54                                      | 43.00                 | 3.00 | 1.66 ± 0.08 | 44.25    | 6.62  | 12–13       | 21 |
| 14  | 39  | 2.50                                        | 15.60                                     | 53.40                 | 3.70 | 1.77 ± 0.16 | 58.20    | 10.15 | 13–14       | 22 |
| 15  | 44  | 2.27                                        | 19.40                                     | 55.50                 | 3.20 | 1.65 ± 0.07 | 69.58    | 11.23 | 14–15       | 37 |
| 16  | 60  | 2.01                                        | 29.90                                     | 116.20                | 5.80 | 2.09 ± 0.21 | 51.29    | 7.10  | 15–16       | 21 |
| 17  | 75  | 5.71                                        | 13.20                                     | 50.20                 | 3.50 | 1.89 ± 0.08 | 52.41    | 7.07  | 16–17       | 3  |
| 18  | 26  | 1.99                                        | 13.10                                     | 48.40                 | 2.50 | 1.78 ± 0.07 | 53.94    | 10.94 | 17–18       | 0  |



|      |     |       |       |        |       |             |       |       |             |   |
|------|-----|-------|-------|--------|-------|-------------|-------|-------|-------------|---|
| 19   | 35  | 4.06  | 8.62  | 28.30  | 1.60  | 1.66 ± 0.16 | 60.67 | 10.81 | 18–19       | 0 |
| 20   | 62  | 5.60  | 11.10 | 41.10  | 2.00  | 1.62 ± 0.16 | 53.82 | 7.32  | 19–20       | 0 |
| 21   | 64  | 4.25  | 15.10 | 60.90  | 3.50  | 1.72 ± 0.13 | 49.43 | 6.80  | MTL = 13.68 |   |
| 22   | 98  | 6.07  | 16.10 | 63.30  | 3.50  | 1.68 ± 0.11 | 50.70 | 5.84  | Var = 0.14  |   |
| 23   | 69  | 4.69  | 14.70 | 63.80  | 2.60  | 1.94        | 45.95 | 5.84  | SD = 1.56   |   |
| 24   | 39  | 3.49  | 11.20 | 48.00  | 4.40  | 1.74 ± 0.21 | 46.53 | 8.58  | N = 121     |   |
| 25   | 32  | 1.60  | 20.00 | 55.90  | 3.50  | 1.72 ± 0.08 | 71.20 | 13.35 |             |   |
| 26   | 137 | 9.92  | 13.80 | 59.30  | 3.80  | 1.82 ± 0.09 | 46.40 | 4.96  |             |   |
| 27   | 92  | 5.56  | 16.60 | 63.10  | 3.90  | 1.96 ± 0.09 | 52.43 | 6.35  |             |   |
| 28   | 96  | 6.99  | 13.70 | 64.10  | 3.60  | 1.82 ± 0.09 | 42.63 | 4.97  |             |   |
| 29   | 21  | 3.86  | 5.44  | 16.10  | 1.20  | 1.89 ± 0.08 | 67.27 | 15.51 |             |   |
| 30   | 20  | 1.74  | 11.50 | 37.60  | 2.40  | 1.75 ± 0.06 | 60.92 | 14.17 |             |   |
| 31   | 61  | 5.04  | 12.10 | 30.40  | 1.70  | 1.74 ± 0.06 | 79.17 | 11.06 |             |   |
| 32   | 73  | 2.86  | 25.60 | 105.60 | 8.10  | 1.82 ± 0.13 | 48.33 | 6.76  |             |   |
| 33   | 61  | 4.54  | 13.40 | 35.70  | 2.90  | 1.63 ± 0.15 | 74.68 | 11.32 |             |   |
| 2005 |     | 139.6 | 15.01 | 54.46  | 20.84 | 1.72 ± 0.14 |       |       |             |   |

Pooled Age = 53.5 ± 1.7 Ma

Central Age = 54.8 ± 1.6 Ma

| Sample ZG09, Apatite Fission-Track Length Data |                          |            |                           |         |       |       |              |      |
|------------------------------------------------|--------------------------|------------|---------------------------|---------|-------|-------|--------------|------|
| ID                                             | L <sub>App</sub><br>(μm) | Dz<br>(μm) | L <sub>True</sub><br>(μm) | Azimuth | Dip   | Angle | DPar<br>(μm) | SD   |
| Length01                                       | 15.31                    | 2.94       | 15.59                     | 71.49   | 10.89 | 71.83 | 2.16         | 0.11 |
| Length02                                       | 13.01                    | 2.45       | 13.24                     | 57.48   | 10.69 | 58.12 | 2.16         | 0.11 |
| Length03                                       | 13.61                    | 2.45       | 13.83                     | 81.3    | 10.22 | 81.44 | 2.02         | 0.08 |
| Length04                                       | 14.33                    | 0          | 14.33                     | 35.01   | 0     | 35.01 | 2.02         | 0.08 |
| Length05                                       | 10.96                    | 0.98       | 11                        | 49.5    | 5.12  | 49.69 | 2.02         | 0.08 |
| Length06                                       | 14.33                    | 1.96       | 14.46                     | 46.23   | 7.8   | 46.73 | 2.02         | 0.08 |
| Length07                                       | 13.88                    | 1.96       | 14.02                     | 58.44   | 8.05  | 58.79 | 1.98         | 0.18 |
| Length08                                       | 12.22                    | 2.94       | 12.57                     | 68.17   | 13.55 | 68.8  | 1.98         | 0.18 |
| Length09                                       | 14.34                    | 0.98       | 14.37                     | 64.69   | 3.92  | 64.75 | 1.98         | 0.18 |
| Length10                                       | 13.97                    | 0.98       | 14                        | 77.13   | 4.02  | 77.16 | 1.89         | 0.05 |
| Length11                                       | 13.39                    | 0          | 13.39                     | 26.35   | 0     | 26.35 | 1.89         | 0.05 |
| Length12                                       | 12.41                    | 0          | 12.41                     | 57.12   | 0     | 57.12 | 1.89         | 0.05 |
| Length13                                       | 15.11                    | 1.96       | 15.23                     | 84.91   | 7.4   | 84.96 | 1.89         | 0.05 |
| Length14                                       | 13.98                    | 0.49       | 13.99                     | 71.19   | 2.01  | 71.2  | 1.5          | 0.11 |
| Length15                                       | 14.49                    | 0          | 14.49                     | 49.05   | 0     | 49.05 | 2.15         | 0.11 |
| Length16                                       | 11.92                    | 0          | 11.92                     | 20.7    | 0     | 20.7  | 2.15         | 0.11 |
| Length17                                       | 13.31                    | 1.96       | 13.45                     | 60.71   | 8.39  | 61.05 | 2.03         | 0.07 |
| Length18                                       | 14.82                    | 0.98       | 14.86                     | 66.67   | 3.79  | 66.72 | 2.03         | 0.07 |
| Length19                                       | 13.47                    | 0          | 13.47                     | 58.88   | 0     | 58.88 | 1.98         | 0.1  |
| Length20                                       | 11.52                    | 1.47       | 11.62                     | 59.99   | 7.28  | 60.26 | 1.98         | 0.1  |
| Length21                                       | 13.69                    | 1.47       | 13.77                     | 45.47   | 6.14  | 45.79 | 1.98         | 0.1  |
| Length22                                       | 13                       | 0.98       | 13.03                     | 41.68   | 4.32  | 41.86 | 2.05         | 0.12 |
| Length23                                       | 13.12                    | 0.98       | 13.16                     | 47.18   | 4.28  | 47.32 | 2.05         | 0.12 |
| Length24                                       | 13.79                    | 1.47       | 13.87                     | 59.29   | 6.09  | 59.48 | 2.05         | 0.12 |
| Length25                                       | 12.95                    | 1.96       | 13.1                      | 35.69   | 8.62  | 36.58 | 2.05         | 0.12 |
| Length26                                       | 14.27                    | 0.98       | 14.3                      | 40.63   | 3.94  | 40.79 | 2.05         | 0.12 |
| Length27                                       | 13.4                     | 1.96       | 13.55                     | 68.44   | 8.33  | 68.68 | 2.05         | 0.12 |
| Length28                                       | 14.03                    | 0          | 14.03                     | 59.4    | 0     | 59.4  | 2.05         | 0.09 |
| Length29                                       | 14.32                    | 1.47       | 14.39                     | 74.46   | 5.87  | 74.54 | 1.87         | 0.05 |
| Length30                                       | 14.72                    | 0          | 14.72                     | 52.35   | 0     | 52.35 | 1.87         | 0.05 |
| Length31                                       | 13.3                     | 1.96       | 13.45                     | 51.72   | 8.39  | 52.21 | 1.87         | 0.05 |

|          |       |      |       |       |       |       |      |      |
|----------|-------|------|-------|-------|-------|-------|------|------|
| Length32 | 11.55 | 7.36 | 13.7  | 43.69 | 32.51 | 52.42 | 1.87 | 0.05 |
| Length33 | 13.71 | 1.47 | 13.79 | 60.17 | 6.13  | 60.36 | 2.05 | 0.15 |
| Length34 | 11.81 | 0    | 11.81 | 73.77 | 0     | 73.77 | 2.05 | 0.15 |
| Length35 | 13.88 | 0    | 13.88 | 67.56 | 0     | 67.56 | 1.66 | 0.1  |
| Length36 | 12.57 | 0    | 12.57 | 59.91 | 0     | 59.91 | 1.91 | 0.1  |
| Length37 | 14.31 | 2.94 | 14.61 | 53.8  | 11.63 | 54.66 | 1.91 | 0.1  |
| Length38 | 14.34 | 1.47 | 14.41 | 57.41 | 5.86  | 57.6  | 1.89 | 0.12 |
| Length39 | 13.03 | 1.47 | 13.11 | 44.24 | 6.45  | 44.61 | 1.94 | 0.17 |
| Length40 | 12.13 | 2.45 | 12.38 | 57.43 | 11.44 | 58.15 | 1.94 | 0.17 |
| Length41 | 13.98 | 1.47 | 14.05 | 16.04 | 6.01  | 17.11 | 1.94 | 0.17 |
| Length42 | 10.86 | 0.49 | 10.87 | 63.72 | 2.59  | 63.74 | 1.94 | 0.17 |
| Length43 | 13.31 | 1.47 | 13.39 | 57.11 | 6.31  | 57.34 | 1.84 | 0.07 |
| Length44 | 14.02 | 1.96 | 14.15 | 77.89 | 7.97  | 78.01 | 1.84 | 0.07 |
| Length45 | 14.22 | 2.45 | 14.43 | 48.72 | 9.79  | 49.45 | 1.83 | 0.1  |
| Length46 | 12.48 | 0    | 12.48 | 19.9  | 0     | 19.9  | 1.83 | 0.1  |
| Length47 | 15.62 | 1.47 | 15.69 | 46.09 | 5.39  | 46.34 | 1.49 | 0.06 |
| Length48 | 14.6  | 0.98 | 14.64 | 46.86 | 3.85  | 46.98 | 1.87 | 0.06 |
| Length49 | 15.07 | 0    | 15.07 | 66.62 | 0     | 66.62 | 2.21 | 0.15 |
| Length50 | 12.9  | 1.96 | 13.05 | 59.05 | 8.65  | 59.44 | 1.88 | 0.08 |
| Length51 | 9.35  | 0.49 | 9.36  | 87.25 | 3.01  | 87.25 | 1.88 | 0.08 |
| Length52 | 12.67 | 1.47 | 12.75 | 63.96 | 6.63  | 64.15 | 1.9  | 0.08 |
| Length53 | 12.94 | 1.47 | 13.03 | 55.66 | 6.49  | 55.91 | 1.9  | 0.08 |
| Length54 | 12.97 | 0    | 12.97 | 30.68 | 0     | 30.68 | 1.9  | 0.08 |
| Length55 | 13.75 | 0    | 13.75 | 67.31 | 0     | 67.31 | 1.98 | 0.11 |
| Length56 | 15.02 | 0.49 | 15.03 | 43.49 | 1.87  | 43.53 | 1.91 | 0.11 |
| Length57 | 13.7  | 2.45 | 13.92 | 54.06 | 10.16 | 54.71 | 1.91 | 0.11 |
| Length58 | 15.12 | 1.47 | 15.19 | 83.91 | 5.56  | 83.94 | 1.91 | 0.11 |
| Length59 | 13.65 | 0    | 13.65 | 32.55 | 0     | 32.55 | 2    | 0.19 |
| Length60 | 14.68 | 0    | 14.68 | 23.26 | 0     | 23.26 | 2    | 0.19 |
| Length61 | 14.75 | 1.96 | 14.88 | 58.72 | 7.58  | 59.02 | 2    | 0.19 |
| Length62 | 14.16 | 1.47 | 14.24 | 63.5  | 5.94  | 63.66 | 2.01 | 0.23 |
| Length63 | 10.69 | 0.49 | 10.7  | 82.05 | 2.63  | 82.06 | 1.91 | 0.04 |
| Length64 | 14.99 | 1.96 | 15.12 | 73.04 | 7.46  | 73.18 | 1.91 | 0.04 |
| Length65 | 14.29 | 2.94 | 14.59 | 85.26 | 11.64 | 85.36 | 1.91 | 0.04 |
| Length66 | 13.41 | 0.98 | 13.45 | 38.75 | 4.19  | 38.94 | 1.91 | 0.04 |
| Length67 | 14.26 | 2.45 | 14.47 | 72.9  | 9.76  | 73.15 | 1.91 | 0.04 |
| Length68 | 13.24 | 1.96 | 13.38 | 82.73 | 8.43  | 82.81 | 1.88 | 0.11 |
| Length69 | 13.62 | 3.44 | 14.05 | 76.78 | 14.16 | 77.19 | 1.99 |      |
| Length70 | 13.66 | 0.49 | 13.66 | 66.17 | 2.06  | 66.19 | 1.99 |      |
| Length71 | 12.8  | 0    | 12.8  | 23.4  | 0     | 23.4  | 1.99 |      |
| Length72 | 12.94 | 2.45 | 13.17 | 38.55 | 10.74 | 39.79 | 1.99 |      |
| Length73 | 15.31 | 1.47 | 15.38 | 81.3  | 5.49  | 81.34 | 1.99 |      |
| Length74 | 14.47 | 0    | 14.47 | 48.63 | 0     | 48.63 | 2    | 0.13 |
| Length75 | 15.32 | 1.96 | 15.45 | 70    | 7.3   | 70.17 | 1.81 | 0.14 |
| Length76 | 13.09 | 2.45 | 13.32 | 70.33 | 10.62 | 70.68 | 1.81 | 0.14 |
| Length77 | 13.99 | 3.44 | 14.4  | 54.23 | 13.8  | 55.42 | 1.81 | 0.14 |
| Length78 | 14.16 | 1.47 | 14.24 | 68.58 | 5.94  | 68.7  | 1.81 | 0.14 |
| Length79 | 13.39 | 3.93 | 13.96 | 76.93 | 16.34 | 77.46 | 1.81 | 0.14 |
| Length80 | 13.14 | 0.49 | 13.15 | 80.78 | 2.14  | 80.78 | 1.93 | 0.08 |
| Length81 | 8.84  | 3.44 | 9.48  | 61.2  | 21.25 | 63.32 | 1.93 | 0.08 |
| Length82 | 13.79 | 1.47 | 13.87 | 86.17 | 6.1   | 86.19 | 1.93 | 0.08 |
| Length83 | 13.25 | 4.42 | 13.97 | 89.53 | 18.43 | 89.55 | 2.04 | 0.06 |
| Length84 | 13.07 | 3.44 | 13.51 | 76.76 | 14.73 | 77.2  | 2.04 | 0.06 |

|           |       |      |       |       |       |       |      |      |
|-----------|-------|------|-------|-------|-------|-------|------|------|
| Length85  | 11.05 | 0.49 | 11.06 | 80.4  | 2.54  | 80.41 | 2.04 | 0.06 |
| Length86  | 9.78  | 0.98 | 9.83  | 59.49 | 5.73  | 59.66 | 2.04 | 0.06 |
| Length87  | 14.6  | 0.98 | 14.63 | 56.38 | 3.85  | 56.47 | 2.04 | 0.06 |
| Length88  | 12.95 | 0.49 | 12.96 | 70.37 | 2.17  | 70.39 | 2.04 | 0.06 |
| Length89  | 13.77 | 0    | 13.77 | 57.29 | 0     | 57.29 | 1.94 | 0.13 |
| Length90  | 12.39 | 3.44 | 12.86 | 46.07 | 15.5  | 48.04 | 1.94 | 0.13 |
| Length91  | 13.25 | 0.98 | 13.29 | 74.37 | 4.24  | 74.41 | 1.94 | 0.13 |
| Length92  | 14.63 | 0    | 14.63 | 41.34 | 0     | 41.34 | 1.9  | 0.11 |
| Length93  | 11.3  | 3.93 | 11.96 | 59.92 | 19.16 | 61.74 | 1.9  | 0.11 |
| Length94  | 13.36 | 0    | 13.36 | 79.28 | 0     | 79.28 | 1.88 | 0.06 |
| Length95  | 13.71 | 0.49 | 13.72 | 53.84 | 2.05  | 53.87 | 1.88 | 0.06 |
| Length96  | 13.56 | 0.98 | 13.59 | 37.93 | 4.14  | 38.12 | 1.84 | 0.22 |
| Length97  | 12.82 | 1.96 | 12.97 | 60.16 | 8.71  | 60.54 | 1.99 | 0.12 |
| Length98  | 13.16 | 2.45 | 13.38 | 85.74 | 10.57 | 85.81 | 1.99 | 0.12 |
| Length99  | 14.15 | 1.47 | 14.22 | 50.09 | 5.94  | 50.34 | 1.99 | 0.12 |
| Length100 | 13.95 | 0    | 13.95 | 59.78 | 0     | 59.78 | 1.99 | 0.12 |
| Length101 | 14.08 | 0.49 | 14.09 | 68.6  | 2     | 68.61 | 1.99 | 0.12 |
| Length102 | 15.72 | 1.96 | 15.85 | 21.16 | 7.12  | 22.28 | 1.99 | 0.12 |

Sample ZG09, Apatite Fission-Track Age Data

| No. | Ns | Area<br>(10 <sup>-5</sup> cm <sup>2</sup> ) | Q <sup>s</sup><br>(10 <sup>5</sup> cm <sup>-2</sup> ) | <sup>238</sup> U(ppm) | 1σ   | Dpar (μm)   | Age (Ma) | 1σ    | Length (μm) | N  |
|-----|----|---------------------------------------------|-------------------------------------------------------|-----------------------|------|-------------|----------|-------|-------------|----|
| 1   | 6  | 2.46                                        | 2.44                                                  | 5.41                  | 0.46 | 1.91 ± 0.04 | 89.63    | 37.38 | 0–1         | 0  |
| 2   | 17 | 4.28                                        | 4.00                                                  | 13.43                 | 0.71 | 1.83 ± 0.13 | 59.36    | 14.73 | 1–2         | 0  |
| 3   | 23 | 2.41                                        | 9.55                                                  | 30.90                 | 1.60 | 1.85 ± 0.00 | 61.57    | 13.23 | 2–3         | 0  |
| 4   | 57 | 4.07                                        | 14.01                                                 | 55.50                 | 3.10 | 2.02 ± 0.12 | 50.32    | 7.23  | 3–4         | 0  |
| 5   | 85 | 4.04                                        | 21.05                                                 | 89.00                 | 5.90 | 2.00 ± 0.05 | 47.16    | 5.99  | 4–5         | 0  |
| 6   | 48 | 4.83                                        | 9.95                                                  | 36.10                 | 2.00 | 1.94 ± 0.08 | 54.90    | 8.49  | 5–6         | 0  |
| 7   | 46 | 6.65                                        | 6.92                                                  | 16.20                 | 1.00 | 1.89 ± 0.05 | 84.89    | 13.57 | 6–7         | 0  |
| 8   | 26 | 4.51                                        | 5.77                                                  | 28.10                 | 1.30 | 2.00 ± 0.11 | 40.93    | 8.25  | 7–8         | 0  |
| 9   | 2  | 2.19                                        | 0.91                                                  | 2.15                  | 0.28 | 1.90 ± 0.07 | 84.44    | 60.71 | 8–9         | 0  |
| 10  | 47 | 3.53                                        | 13.31                                                 | 56.30                 | 3.00 | 2.03 ± 0.07 | 47.14    | 7.32  | 9–10        | 3  |
| 11  | 4  | 3.16                                        | 1.26                                                  | 4.58                  | 0.59 | 1.72 ± 0.10 | 54.99    | 28.40 | 10–11       | 2  |
| 12  | 8  | 5.34                                        | 1.50                                                  | 5.30                  | 0.66 | 2.18 ± 0.11 | 56.32    | 21.11 | 11–12       | 6  |
| 13  | 15 | 5.14                                        | 2.92                                                  | 6.81                  | 0.44 | 2.00 ± 0.12 | 85.24    | 22.69 | 12–13       | 11 |
| 14  | 3  | 2.80                                        | 1.07                                                  | 4.45                  | 0.47 | 1.67 ± 0.12 | 48.07    | 28.22 | 13–14       | 40 |
| 15  | 3  | 3.81                                        | 0.79                                                  | 2.31                  | 0.26 | 1.89 ± 0.05 | 67.81    | 39.89 | 14–15       | 30 |
| 16  | 65 | 5.60                                        | 11.62                                                 | 30.00                 | 1.80 | 1.98 ± 0.05 | 77.05    | 10.62 | 15–16       | 10 |
| 17  | 31 | 4.13                                        | 7.50                                                  | 27.60                 | 1.40 | 1.95 ± 0.07 | 54.15    | 10.11 | 16–17       | 0  |
| 18  | 20 | 3.47                                        | 5.76                                                  | 23.40                 | 1.50 | 2.10 ± 0.09 | 49.06    | 11.41 | 17–18       | 0  |
| 19  | 24 | 6.35                                        | 3.78                                                  | 17.60                 | 1.10 | 1.82 ± 0.12 | 42.86    | 9.15  | 18–19       | 0  |
| 20  | 4  | 3.72                                        | 1.07                                                  | 3.56                  | 0.29 | 1.87 ± 0.14 | 60.09    | 30.44 | 19–20       | 0  |
| 21  | 11 | 4.08                                        | 2.69                                                  | 7.88                  | 0.46 | 2.02 ± 0.11 | 68.06    | 20.90 | MTL = 13.59 |    |
| 22  | 31 | 2.73                                        | 11.34                                                 | 41.40                 | 2.00 | 2.00 ± 0.10 | 54.58    | 10.15 | Var = 0.12  |    |
| 23  | 38 | 4.41                                        | 8.62                                                  | 35.80                 | 2.10 | 2.17 ± 0.11 | 47.99    | 8.28  | SD = 1.24   |    |
| 24  | 8  | 3.14                                        | 2.55                                                  | 10.37                 | 0.76 | 2.03 ± 0.11 | 49.04    | 17.71 | N = 102     |    |
| 25  | 7  | 4.23                                        | 1.65                                                  | 5.29                  | 0.58 | 1.89 ± 0.04 | 62.23    | 24.49 |             |    |
| 26  | 27 | 2.37                                        | 11.39                                                 | 45.50                 | 3.10 | 1.92 ± 0.06 | 49.90    | 10.19 |             |    |
| 27  | 42 | 3.40                                        | 12.37                                                 | 37.40                 | 3.50 | 1.90 ± 0.07 | 65.85    | 11.88 |             |    |
| 28  | 20 | 2.78                                        | 7.19                                                  | 21.20                 | 1.40 | 1.95 ± 0.16 | 67.50    | 15.74 |             |    |
| 29  | 12 | 3.370                                       | 3.56                                                  | 11.44                 | 0.92 | 1.70 ± 0.09 | 62.01    | 18.58 |             |    |
| 30  | 16 | 5.830                                       | 2.75                                                  | 11.26                 | 0.77 | 2.02 ± 0.17 | 48.62    | 12.60 |             |    |
| 31  | 36 | 10.92                                       | 3.30                                                  | 10.24                 | 0.70 | 1.72 ± 0.15 | 64.13    | 11.55 |             |    |

|     |    |       |      |       |       |             |       |       |
|-----|----|-------|------|-------|-------|-------------|-------|-------|
| 32  | 22 | 7.26  | 3.03 | 12.86 | 0.98  | 1.91 ± 0.12 | 46.98 | 10.64 |
| 33  | 43 | 5.62  | 7.66 | 18.20 | 1.20  | 2.06 ± 0.17 | 83.65 | 13.90 |
| 34  | 12 | 4.54  | 2.64 | 8.71  | 0.59  | 1.93 ± 0.09 | 60.44 | 17.92 |
| 35  | 36 | 5.47  | 6.58 | 19.20 | 1.20  | 1.74 ± 0.08 | 68.21 | 12.14 |
| 36  | 13 | 4.00  | 3.25 | 11.22 | 0.75  | 1.96 ± 0.18 | 57.64 | 16.44 |
| 908 |    | 156.6 | 5.99 | 21.30 | 18.94 | 1.93 ± 0.12 |       |       |

**Pooled Age = 56.8 ± 2.2 Ma**

**Central Age = 58.1 ± 2.4 Ma**

**Sample ZG11, Apatite Fission-Track Length Data.**

| ID       | L <sub>App</sub><br>(μm) | Dz<br>(μm) | L <sub>True</sub><br>(μm) | Azimuth | Dip   | Angle | DPar<br>(μm) | SD   |
|----------|--------------------------|------------|---------------------------|---------|-------|-------|--------------|------|
| Length01 | 15.61                    | 1.47       | 15.68                     | 56.64   | 5.39  | 56.81 | 1.68         | 0.12 |
| Length02 | 13.44                    | 0.49       | 13.45                     | 67.13   | 2.09  | 67.15 | 1.66         | 0.05 |
| Length03 | 10.59                    | 1.47       | 10.69                     | 70.52   | 7.91  | 70.72 | 1.66         | 0.05 |
| Length04 | 13.3                     | 0          | 13.3                      | 53.54   | 0     | 53.54 | 1.66         | 0.05 |
| Length05 | 13.4                     | 0          | 13.4                      | 56.14   | 0     | 56.14 | 1.76         | 0.17 |
| Length06 | 14.66                    | 0          | 14.66                     | 46.73   | 0     | 46.73 | 1.76         | 0.17 |
| Length07 | 12.94                    | 0.98       | 12.97                     | 72.96   | 4.34  | 73.01 | 1.35         | 0.12 |
| Length08 | 11.44                    | 0.49       | 11.45                     | 52.62   | 2.46  | 52.66 | 1.67         | 0.09 |
| Length09 | 9.26                     | 0.49       | 9.27                      | 80.53   | 3.03  | 80.54 | 1.54         | 0.04 |
| Length10 | 11.07                    | 1.96       | 11.24                     | 79.26   | 10.06 | 79.42 | 1.67         | 0.12 |
| Length11 | 11.6                     | 1.47       | 11.69                     | 42.64   | 7.23  | 43.13 | 1.67         | 0.12 |
| Length12 | 12.2                     | 2.45       | 12.44                     | 55.56   | 11.38 | 56.33 | 1.67         | 0.08 |
| Length13 | 13.28                    | 2.45       | 13.51                     | 28.32   | 10.47 | 30.04 | 1.67         | 0.08 |
| Length14 | 11.2                     | 1.47       | 11.3                      | 87.75   | 7.49  | 87.77 | 1.67         | 0.08 |
| Length15 | 11.46                    | 1.47       | 11.55                     | 76.98   | 7.32  | 77.09 | 1.66         | 0.1  |
| Length16 | 13.61                    | 1.47       | 13.69                     | 72.73   | 6.17  | 72.83 | 1.66         | 0.1  |
| Length17 | 10.4                     | 0.49       | 10.41                     | 76.44   | 2.7   | 76.45 | 1.66         | 0.1  |
| Length18 | 10.96                    | 0.98       | 11                        | 77.94   | 5.12  | 77.99 | 1.66         | 0.1  |
| Length19 | 12.79                    | 0.98       | 12.82                     | 59.78   | 4.39  | 59.88 | 1.66         | 0.1  |
| Length20 | 12.94                    | 0.98       | 12.97                     | 79.05   | 4.34  | 79.08 | 1.66         | 0.1  |
| Length21 | 11.79                    | 0.49       | 11.8                      | 54.52   | 2.38  | 54.56 | 1.66         | 0.1  |
| Length22 | 13.53                    | 2.45       | 13.75                     | 28.14   | 10.28 | 29.81 | 1.66         | 0.1  |
| Length23 | 15.54                    | 1.47       | 15.61                     | 46      | 5.41  | 46.25 | 1.66         | 0.1  |
| Length24 | 12.61                    | 2.45       | 12.85                     | 74.92   | 11.01 | 75.2  | 1.66         | 0.1  |
| Length25 | 12.02                    | 1.47       | 12.11                     | 53.13   | 6.98  | 53.44 | 1.66         | 0.1  |
| Length26 | 11.77                    | 2.45       | 12.02                     | 63.56   | 11.78 | 64.16 | 1.66         | 0.1  |
| Length27 | 14.1                     | 0.49       | 14.11                     | 32.22   | 1.99  | 32.28 | 1.66         | 0.1  |
| Length28 | 10.11                    | 0.98       | 10.16                     | 67.83   | 5.54  | 67.94 | 1.73         | 0.09 |
| Length29 | 12.13                    | 0          | 12.13                     | 63.26   | 0     | 63.26 | 1.73         | 0.09 |
| Length30 | 13.21                    | 0.98       | 13.25                     | 25.32   | 4.25  | 25.65 | 1.73         | 0.09 |
| Length31 | 12.04                    | 1.96       | 12.2                      | 49.17   | 9.26  | 49.82 | 1.73         | 0.09 |
| Length32 | 11.28                    | 0          | 11.28                     | 75.68   | 0     | 75.68 | 1.53         | 0.11 |
| Length33 | 11.68                    | 2.45       | 11.94                     | 64.59   | 11.86 | 65.17 | 1.53         | 0.11 |
| Length34 | 12.04                    | 0.49       | 12.05                     | 73      | 2.33  | 73.01 | 1.61         | 0.09 |
| Length35 | 13.71                    | 0.98       | 13.74                     | 71.78   | 4.1   | 71.83 | 1.69         | 0.08 |
| Length36 | 14.43                    | 2.45       | 14.64                     | 58.19   | 9.65  | 58.69 | 1.69         | 0.08 |
| Length37 | 12.34                    | 0.49       | 12.35                     | 59.85   | 2.28  | 59.88 | 1.51         | 0.09 |
| Length38 | 12.52                    | 0.49       | 12.53                     | 57.75   | 2.24  | 57.78 | 1.74         | 0.06 |
| Length39 | 14.06                    | 0.98       | 14.1                      | 40.44   | 3.99  | 40.6  | 1.74         | 0.06 |
| Length40 | 10.91                    | 0          | 10.91                     | 40.88   | 0     | 40.88 | 1.74         | 0.06 |
| Length41 | 8.45                     | 0.98       | 8.51                      | 22.9    | 6.63  | 23.79 | 1.74         | 0.06 |

|          |       |      |       |       |       |       |      |      |
|----------|-------|------|-------|-------|-------|-------|------|------|
| Length42 | 13.76 | 0.49 | 13.77 | 72.35 | 2.04  | 72.36 | 1.74 | 0.06 |
| Length43 | 13.51 | 2.45 | 13.73 | 76.4  | 10.29 | 76.63 | 1.74 | 0.06 |
| Length44 | 13.46 | 0.98 | 13.5  | 70.54 | 4.17  | 70.6  | 1.74 | 0.06 |
| Length45 | 11.7  | 0.49 | 11.71 | 20.85 | 2.4   | 20.98 | 1.74 | 0.06 |
| Length46 | 13.78 | 0    | 13.78 | 84.47 | 0     | 84.47 | 1.74 | 0.06 |
| Length47 | 14.6  | 0    | 14.6  | 62.9  | 0     | 62.9  | 1.74 | 0.06 |
| Length48 | 13.83 | 1.96 | 13.97 | 80.24 | 8.08  | 80.34 | 1.7  | 0.07 |
| Length49 | 10.22 | 0.49 | 10.23 | 33.8  | 2.75  | 33.89 | 1.7  | 0.07 |
| Length50 | 14.59 | 0.49 | 14.6  | 74.51 | 1.93  | 74.52 | 1.69 | 0.12 |
| Length51 | 13.1  | 0.98 | 13.14 | 82.34 | 4.29  | 82.36 | 1.69 | 0.12 |
| Length52 | 15.49 | 0    | 15.49 | 45.47 | 0     | 45.47 | 1.76 | 0.18 |
| Length53 | 11.19 | 1.96 | 11.36 | 39.58 | 9.95  | 40.62 | 1.76 | 0.18 |
| Length54 | 14.75 | 0.49 | 14.76 | 55.56 | 1.91  | 55.58 | 1.76 | 0.18 |
| Length55 | 9.61  | 0    | 9.61  | 36.18 | 0     | 36.18 | 1.76 | 0.18 |
| Length56 | 13.71 | 1.47 | 13.79 | 65.54 | 6.13  | 65.69 | 1.47 | 0.08 |
| Length57 | 10.37 | 1.47 | 10.48 | 62.47 | 8.08  | 62.76 | 1.47 | 0.08 |
| Length58 | 13.44 | 0.98 | 13.48 | 33.86 | 4.18  | 34.08 | 1.66 | 0.06 |
| Length59 | 12.21 | 0    | 12.21 | 78.93 | 0     | 78.93 | 1.66 | 0.06 |
| Length60 | 16.54 | 0.98 | 16.57 | 78.59 | 3.4   | 78.61 | 1.66 | 0.06 |
| Length61 | 14.61 | 1.47 | 14.68 | 36.08 | 5.75  | 36.47 | 1.8  | 0.12 |
| Length62 | 12.54 | 1.47 | 12.63 | 73.44 | 6.69  | 73.56 | 1.8  | 0.12 |
| Length63 | 11.22 | 0    | 11.22 | 69.54 | 0     | 69.54 | 1.8  | 0.12 |
| Length64 | 12.26 | 0    | 12.26 | 47.09 | 0     | 47.09 | 1.73 | 0.24 |
| Length65 | 14.5  | 2.45 | 14.71 | 60.04 | 9.6   | 60.5  | 1.77 | 0.12 |
| Length66 | 13.46 | 0    | 13.46 | 59.48 | 0     | 59.48 | 1.77 | 0.12 |
| Length67 | 15.15 | 0.49 | 15.15 | 44.9  | 1.86  | 44.93 | 1.61 | 0.23 |
| Length68 | 15.03 | 0.98 | 15.07 | 26.48 | 3.74  | 26.73 | 1.61 | 0.23 |
| Length69 | 12.01 | 0.98 | 12.05 | 64.89 | 4.67  | 64.98 | 1.59 | 0.1  |
| Length70 | 12.41 | 0    | 12.41 | 51.78 | 0     | 51.78 | 1.61 | 0.08 |
| Length71 | 13.87 | 0.49 | 13.88 | 34.7  | 2.03  | 34.75 | 1.61 | 0.08 |
| Length72 | 14.32 | 0.49 | 14.33 | 78.83 | 1.96  | 78.83 | 1.61 | 0.08 |
| Length73 | 12.3  | 0    | 12.3  | 50.25 | 0     | 50.25 | 1.67 | 0.04 |
| Length74 | 11.09 | 4.42 | 11.94 | 73.44 | 21.72 | 74.65 | 1.67 | 0.04 |
| Length75 | 11.61 | 0.49 | 11.62 | 61.21 | 2.42  | 61.23 | 1.8  | 0.07 |
| Length76 | 14.05 | 1.47 | 14.12 | 57.37 | 5.98  | 57.57 | 1.56 | 0.08 |
| Length77 | 12.02 | 0.98 | 12.06 | 74.74 | 4.67  | 74.8  | 1.56 | 0.08 |
| Length78 | 13.34 | 1.47 | 13.42 | 40.75 | 6.3   | 41.15 | 1.6  | 0.06 |
| Length79 | 13.04 | 0    | 13.04 | 82.91 | 0     | 82.91 | 1.71 | 0.11 |
| Length80 | 10.54 | 0.49 | 10.55 | 69.48 | 2.67  | 69.5  | 1.71 | 0.11 |
| Length81 | 11.76 | 0.98 | 11.8  | 50.26 | 4.77  | 50.43 | 1.67 | 0.12 |
| Length82 | 11.74 | 0.98 | 11.79 | 55.97 | 4.78  | 56.1  | 1.67 | 0.12 |
| Length83 | 12.61 | 1.96 | 12.76 | 40.8  | 8.85  | 41.58 | 1.67 | 0.12 |
| Length84 | 15.29 | 2.45 | 15.48 | 30.44 | 9.12  | 31.65 | 1.67 | 0.12 |
| Length85 | 14.52 | 0.49 | 14.53 | 48.03 | 1.94  | 48.06 | 1.57 | 0.06 |
| Length86 | 12.4  | 1.96 | 12.56 | 72.87 | 9     | 73.09 | 1.57 | 0.06 |
| Length87 | 10.2  | 1.96 | 10.39 | 28.48 | 10.89 | 30.33 | 1.66 | 0.21 |
| Length88 | 13.53 | 2.94 | 13.85 | 75.96 | 12.28 | 76.28 | 1.66 | 0.21 |
| Length89 | 13.95 | 0.49 | 13.96 | 76.8  | 2.01  | 76.81 | 1.78 | 0.13 |
| Length90 | 13.08 | 0    | 13.08 | 56.49 | 0     | 56.49 | 1.78 | 0.13 |
| Length91 | 14.05 | 1.96 | 14.18 | 73.68 | 7.96  | 73.85 | 1.78 | 0.13 |
| Length92 | 12.85 | 1.47 | 12.93 | 41.4  | 6.54  | 41.82 | 1.78 | 0.13 |
| Length93 | 14.34 | 0.49 | 14.34 | 42.77 | 1.96  | 42.81 | 1.78 | 0.13 |
| Length94 | 14.09 | 0.49 | 14.1  | 76.05 | 1.99  | 76.06 | 1.57 | 0.06 |

|           |       |      |       |       |       |       |      |      |
|-----------|-------|------|-------|-------|-------|-------|------|------|
| Length95  | 15.07 | 0.98 | 15.11 | 37.22 | 3.73  | 37.38 | 1.59 | 0.1  |
| Length96  | 12.22 | 1.96 | 12.38 | 44.26 | 9.13  | 44.99 | 1.59 | 0.1  |
| Length97  | 11.28 | 2.45 | 11.54 | 73.42 | 12.28 | 73.81 | 1.84 | 0.09 |
| Length98  | 15.58 | 1.47 | 15.65 | 30.8  | 5.4   | 31.23 | 1.84 | 0.09 |
| Length99  | 11.23 | 0    | 11.23 | 67    | 0     | 67    | 1.6  | 0.04 |
| Length100 | 11.43 | 1.96 | 11.6  | 68.51 | 9.74  | 68.83 | 1.6  | 0.04 |
| Length101 | 10.95 | 0.98 | 10.99 | 67.39 | 5.12  | 67.49 | 1.6  | 0.04 |
| Length102 | 12.48 | 0    | 12.48 | 14.89 | 0     | 14.89 | 1.52 | 0.05 |
| Length103 | 10.23 | 0    | 10.23 | 56.84 | 0     | 56.84 | 1.52 | 0.05 |
| Length104 | 13.77 | 1.47 | 13.85 | 47.54 | 6.1   | 47.84 | 1.52 | 0.05 |
| Length105 | 12.41 | 0    | 12.41 | 60.88 | 0     | 60.88 | 1.52 | 0.05 |
| Length106 | 13.18 | 0    | 13.18 | 56.05 | 0     | 56.05 | 1.65 | 0.12 |
| Length107 | 11.35 | 0.49 | 11.36 | 65.61 | 2.48  | 65.63 | 1.65 | 0.12 |
| Length108 | 14.99 | 1.47 | 15.06 | 30.08 | 5.61  | 30.55 | 1.65 | 0.12 |
| Length109 | 14.97 | 0    | 14.97 | 47.1  | 0     | 47.1  | 1.67 | 0.06 |
| Length110 | 13.27 | 1.96 | 13.42 | 67.4  | 8.41  | 67.66 | 1.64 | 0.11 |

Sample ZG11, Apatite Fission-Track Age Data

| No.  | Ns  | Area<br>(10 <sup>-5</sup> cm <sup>2</sup> ) | Qs<br>(10 <sup>5</sup> cm <sup>-2</sup> ) | <sup>238</sup> U(ppm) | 1σ    | Dpar (μm)   | Age (Ma) | 1σ    | Length (μm) | N  |
|------|-----|---------------------------------------------|-------------------------------------------|-----------------------|-------|-------------|----------|-------|-------------|----|
| 1    | 60  | 3.62                                        | 16.57                                     | 51.30                 | 3.40  | 1.74 ± 0.11 | 64.32    | 9.33  | 0–1         | 0  |
| 2    | 20  | 2.12                                        | 9.45                                      | 30.40                 | 1.90  | 1.80 ± 0.10 | 61.88    | 14.37 | 1–2         | 0  |
| 3    | 26  | 2.17                                        | 11.98                                     | 41.10                 | 2.90  | 1.79 ± 0.09 | 58.07    | 12.10 | 2–3         | 0  |
| 4    | 18  | 2.61                                        | 6.90                                      | 20.50                 | 1.10  | 1.79 ± 0.19 | 66.98    | 16.19 | 3–4         | 0  |
| 5    | 31  | 3.34                                        | 9.28                                      | 27.20                 | 1.90  | 1.73 ± 0.06 | 67.92    | 13.09 | 4–5         | 0  |
| 6    | 17  | 3.13                                        | 5.43                                      | 16.20                 | 1.10  | 1.72 ± 0.14 | 66.67    | 16.79 | 5–6         | 0  |
| 7    | 58  | 2.46                                        | 23.54                                     | 71.00                 | 3.80  | 1.88 ± 0.11 | 66.01    | 9.36  | 6–7         | 0  |
| 8    | 67  | 5.73                                        | 11.69                                     | 32.70                 | 2.00  | 1.94 ± 0.11 | 71.15    | 9.72  | 7–8         | 0  |
| 9    | 29  | 1.80                                        | 16.08                                     | 71.30                 | 4.30  | 1.79 ± 0.08 | 44.98    | 8.78  | 8–9         | 1  |
| 10   | 38  | 1.97                                        | 19.25                                     | 52.70                 | 3.80  | 1.74 ± 0.05 | 72.69    | 12.90 | 9–10        | 2  |
| 11   | 60  | 3.11                                        | 19.28                                     | 81.30                 | 6.30  | 1.77 ± 0.08 | 47.28    | 7.12  | 10–11       | 10 |
| 12   | 50  | 2.33                                        | 21.49                                     | 63.90                 | 3.50  | 1.66 ± 0.09 | 66.95    | 10.15 | 11–12       | 20 |
| 13   | 35  | 2.63                                        | 13.33                                     | 43.30                 | 2.50  | 1.69 ± 0.23 | 61.31    | 10.95 | 12–13       | 25 |
| 14   | 19  | 1.98                                        | 9.579                                     | 26.30                 | 2.00  | 1.70 ± 0.06 | 72.48    | 17.52 | 13–14       | 26 |
| 15   | 120 | 6.37                                        | 18.83                                     | 70.80                 | 4.60  | 1.87 ± 0.07 | 53.01    | 5.94  | 14–15       | 16 |
| 16   | 28  | 2.40                                        | 11.65                                     | 33.20                 | 1.60  | 1.74 ± 0.15 | 69.84    | 13.62 | 15–16       | 9  |
| 17   | 36  | 3.53                                        | 10.21                                     | 34.00                 | 1.80  | 1.79 ± 0.05 | 59.82    | 10.46 | 16–17       | 1  |
| 18   | 60  | 3.75                                        | 16.00                                     | 50.40                 | 2.90  | 1.78 ± 0.12 | 63.22    | 8.94  | 17–18       | 0  |
| 19   | 15  | 1.24                                        | 12.10                                     | 51.00                 | 2.90  | 1.83 ± 0.12 | 47.31    | 12.51 | 18–19       | 0  |
| 20   | 85  | 2.88                                        | 29.56                                     | 79.30                 | 4.40  | 1.75 ± 0.07 | 74.17    | 9.04  | 19–20       | 0  |
| 21   | 18  | 1.33                                        | 13.54                                     | 39.90                 | 2.50  | 1.74 ± 0.10 | 67.56    | 16.48 | MTL = 12.84 |    |
| 22   | 73  | 3.39                                        | 21.51                                     | 62.40                 | 4.30  | 1.90 ± 0.08 | 68.62    | 9.32  | Var = 0.15  |    |
| 23   | 35  | 3.70                                        | 9.46                                      | 32.20                 | 1.80  | 1.95 ± 0.04 | 58.51    | 10.42 | SD = 1.57   |    |
| 24   | 19  | 2.09                                        | 9.09                                      | 28.90                 | 2.90  | 1.70 ± 0.12 | 62.63    | 15.68 | N = 110     |    |
| 25   | 47  | 5.70                                        | 8.24                                      | 31.90                 | 1.60  | 1.75 ± 0.06 | 51.51    | 7.94  |             |    |
| 26   | 104 | 5.13                                        | 20.27                                     | 85.00                 | 5.20  | 1.80 ± 0.10 | 47.55    | 5.50  |             |    |
| 27   | 24  | 3.08                                        | 7.80                                      | 22.10                 | 1.30  | 1.96 ± 0.07 | 70.26    | 14.93 |             |    |
| 28   | 41  | 2.14                                        | 19.18                                     | 87.50                 | 6.90  | 1.74 ± 0.08 | 43.72    | 7.65  |             |    |
| 29   | 57  | 2.57                                        | 22.19                                     | 56.50                 | 3.50  | 1.81 ± 0.08 | 78.12    | 11.42 |             |    |
| 30   | 14  | 2.10                                        | 6.67                                      | 20.30                 | 1.60  | 1.63 ± 0.15 | 65.39    | 18.22 |             |    |
| 31   | 35  | 3.95                                        | 8.85                                      | 25.30                 | 1.80  | 1.73 ± 0.07 | 69.65    | 12.77 |             |    |
| 1339 |     | 94.36                                       | 14.16                                     | 46.45                 | 21.38 | 1.78 ± 0.08 |          |       |             |    |

Pooled Age = 60.2 ± 1.8 Ma

**Central Age =  $61.5 \pm 2.0$  Ma**

Note:  $N_s$  is the number of spontaneous tracks counted;  $Q_s$  is the spontaneous track density;  $D_{par}$  is the long axis of track etch pit parallel to the crystallographic  $c$ -axis; MTL = mean track length; SD =  $D_{par}$  standard deviation;  $N$  = number of track lengths measured; ID = length name;  $L_{App}$  = apparent length;  $dz$  = corrected  $z$  depth;  $L_{True}$  = true length; angle = angle to  $c$ -axis.

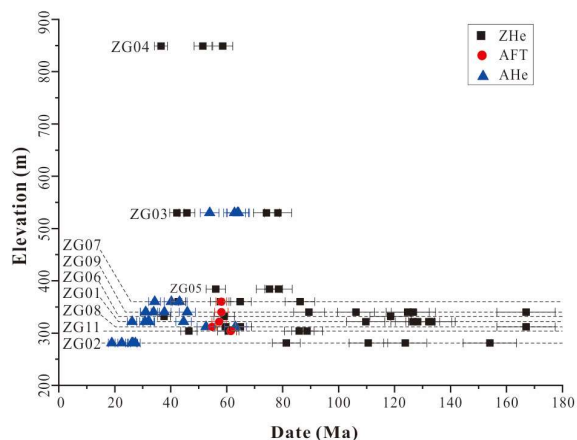

**Figure 1.** Plot of ZHe, AHe and AFT ages versus sample elevation.
